# Supplementary material for: In silico environmental risk assessment of fate and effects of pharmaceuticals and their TPs generated and treated by coupling tertiary processes in hospital wastewater
Source: Royal Society of Chemistry journal article supplement (doi:10.1039/d2ew00518b), 2022-12-05
Supplement: d2ew00518b1.pdf [file d2ew00518b1.pdf]

## **Supplementary Material**

# ***In silico* environmental risk assessment of fate and effects of pharmaceuticals and their TPs generated and treated by coupling tertiary processes in hospital wastewater**

Alexandre Della-Flora<sup>a</sup>, Davi Scunderlick<sup>a</sup>, Marcelo L. Wilde<sup>a</sup>, Adriano de A. Gomes<sup>a</sup>,

Eder C. Lima<sup>a</sup> and Carla Sirtori<sup>a †</sup>

<sup>a</sup>Instituto de Química, Universidade Federal do Rio Grande do Sul, Av. Bento Gonçalves 9500, CEP 91501-970 Porto Alegre, RS, Brazil.

<sup>†</sup> Corresponding author: Prof. Dr. Carla Sirtori – [carla.sirtori@ufrgs.br](mailto:carla.sirtori@ufrgs.br)

**Text S1.** SMILES codes for *in silico* predictions of pharmaceuticals and TPs.

**Table S1.** SMILES codes for *in silico* predictions of pharmaceuticals and TPs.

| Compound   | Smiles                                                              |
|------------|---------------------------------------------------------------------|
| CLO        | <chem>O=C(NC(CO)C(O)C1=CC=C([N+](O-)=O)C=C1)C(Cl)Cl</chem>          |
| CLO TP2    | <chem>O=C(NC(CO)C(O)C1=CC=C([N+](O-)=O)C=C1)C(Cl)(O)Cl</chem>       |
| CLO TP3    | <chem>O=C(NC(CO)C(O)C1=CC(O)=C([N+](O-)=O)C=C1)C(Cl)Cl</chem>       |
| CLO TP6    | <chem>O=C(CO)C1=CC=C([N+](O-)=O)C=C1</chem>                         |
| CLO TP16   | <chem>O=C(N/C(C(O)C1=CC=C([N+](O-)=O)C=C1)=C/O)C(Cl)Cl</chem>       |
| CLO TP18   | <chem>O=[N+](C1=CC=C(C(O)=O)C=C1)[O-]</chem>                        |
| FCZ        | <chem>OC(CN1N=CN=C1)(C2=CC=C(F)C=C2F)CN3N=CN=C3</chem>              |
| FCZ TP2-a  | <chem>FC1=CC=C(C(CN2N=CN=C2)CN3N=CN=C3)C(O)=C1</chem>               |
| FCZ TP2-b  | <chem>FC1=CC(O)=CC=C1C(CN2N=CN=C2)CN3N=CN=C3</chem>                 |
| FCZ TP5-a  | <chem>OC(C(O)N1N=CN=C1)(C2=CC=C(F)C=C2F)CN3N=CN=C3</chem>           |
| FCZ TP5-b  | <chem>OC(CN4N=CN=C4)(C5=CC=C(F)C=C5F)C(O)N6N=CN=C6</chem>           |
| FLT        | <chem>O=C(Nc1ccc(c1)C(F)(F)F)[N+](=O)[O-]C(C)C</chem>               |
| FLT TP3a   | <chem>O=CC(O)=C(C(O)=C(C=O)NC(O)(O)C(OS(=O)O)(C)CO)C(F)(F)F</chem>  |
| FLT TP3b   | <chem>O=CC(O)=C(NC(O)(O)C(OS(=O)O)(C)CO)C(O)=C(C=O)C(F)(F)F</chem>  |
| FLT TP6/7a | <chem>O=[N+](O-)[c1c(O)cc(cc1C(F)(F)F)NCC(=C)C</chem>               |
| FLT TP6/7b | <chem>O=[N+](O-)[c1cc(O)c(cc1C(F)(F)F)NCC(=C)C</chem>               |
| FLT TP6/7c | <chem>O=[N+](O-)[c1ccc(NCC(=C)C)c(O)c1C(F)(F)F</chem>               |
| FLT TP8-a  | <chem>O=C(Nc1ccc(O)c(c1)C(F)(F)F)C(C)C</chem>                       |
| FLT TP8-b  | <chem>O=C(Nc1cc(O)cc(c1)C(F)(F)F)C(C)C</chem>                       |
| FLT TP8-c  | <chem>O=C(Nc1cc(ccc1(O))C(F)(F)F)C(C)C</chem>                       |
| FLT TP8-d  | <chem>O=C(Nc1cccc(c1(O))C(F)(F)F)C(C)C</chem>                       |
| FLT TP9    | <chem>O=C(Nc1ccc(c1)C(F)(F)F)[N+](=O)[O-]C(C)CO</chem>              |
| FLT TP10-a | <chem>O=C(Nc1cc(O)c(c1)C(F)(F)F)[N+](=O)[O-]C(OS(=O)O)(C)C</chem>   |
| FLT TP10-b | <chem>O=C(Nc1cc(ccc1(O)))[N+](=O)[O-]C(F)(F)F)C(OS(=O)O)(C)C</chem> |
| FLT TP10-c | <chem>O=C(Nc1ccc(c1(O))C(F)(F)F)[N+](=O)[O-]C(OS(=O)O)(C)C</chem>   |
| FLT TP11   | <chem>O=C(Nc1ccc(c1)C(F)(F)F)[N+](=O)[O-]C(O)(C)C</chem>            |
| FLT TP13-a | <chem>O=C(Nc1cc(O)c(c1)C(F)(F)F)[N+](=O)[O-]C(C)C</chem>            |
| FLT TP13-b | <chem>O=C(Nc1cc(ccc1(O)))[N+](=O)[O-]C(F)(F)F)C(C)C</chem>          |
| FLT TP13-c | <chem>O=C(Nc1ccc(c1(O))C(F)(F)F)[N+](=O)[O-]C(C)C</chem>            |
| FRS        | <chem>O=C(O)C1=CC(S(=O)(N)=O)=C(Cl)C=C1NCC2=CC=CO2</chem>           |
| FRS TP3    | <chem>O=C(O)C1=CC(S(=O)(N)=O)=C(Cl)C=C1N</chem>                     |
| FRS TP12-a | <chem>O=C(O)C1=CC(S(=O)(N)=O)=C(O)C=C1NCC2=CC=CO2</chem>            |
| FRS TP12-b | <chem>O=C(O)C3=CC(S(=O)(N)=O)=CC(O)=C3NCC4=CC=CO4</chem>            |
| FRS TP12-c | <chem>O=C(O)C5=C(O)C(S(=O)(N)=O)=CC=C5NCC6=CC=CO6</chem>            |
| FRS TP14-a | <chem>O=C(O)C1=CC(S(=O)(N)=O)=C(O)C=C1N</chem>                      |
| FRS TP14-b | <chem>O=C(O)C2=C(O)C(S(=O)(N)=O)=CC=C2N</chem>                      |
| FRS TP14-c | <chem>O=C(O)C3=CC(S(=O)(N)=O)=CC(O)=C3N</chem>                      |
| GFZ        | <chem>O=C(O)C(C)C(C)CCOC1=CC(C)=CC=C1C</chem>                       |
| GFZ TP8    | <chem>CC1=CC=C(C)C(OC(O)=O)=C1</chem>                               |
| IBP        | <chem>CC(C1=CC=C(CC(C)C)C=C1)C(O)=O</chem>                          |
| IBP TP4-a  | <chem>CC(C)CC1=C(O)C=C(C(C)C(O)=O)C=C1</chem>                       |
| IBP TP4-b  | <chem>CC(C)CC2=CC(O)=C(C(C)C(O)=O)C=C2</chem>                       |
| IBP TP4-c  | <chem>CC(C)CC3=CC=C(C(C)C(O)=O)C(O)=C3</chem>                       |
| IBP TP4-d  | <chem>CC(C)CC4=CC=C(C(C)C(O)=O)C=C4O</chem>                         |
| IBP TP4-e  | <chem>CC(C)C(O)C1=CC=C(C(C)C(O)=O)C=C1</chem>                       |

|             |                                                                                     |
|-------------|-------------------------------------------------------------------------------------|
| IBP TP4-f   | <chem>CC(C)(O)CC2=CC=C(C(C)C(O)=O)C=C2</chem>                                       |
| IBP TP4-g   | <chem>CC(CO)CC3=CC=C(C(C)C(O)=O)C=C3</chem>                                         |
| IBP TP4-h   | <chem>CC(CO)CC4=CC=C(C(C)C(O)=O)C=C4</chem>                                         |
| IBP TP7-a   | <chem>CC(C)CC1=CC=C(CCO)C=C1</chem>                                                 |
| IBP TP7-b   | <chem>CC(C)CC2=CC=C(C(O)C)C=C2</chem>                                               |
| IBP TP7-c   | <chem>CC(C)CC3=C(O)C=C(CC)C=C3</chem>                                               |
| IBP TP7-d   | <chem>CC(C)CC4=CC(O)=C(CC)C=C4</chem>                                               |
| IBP TP7-e   | <chem>CC(C)CC5=CC=C(CC)C(O)=C5</chem>                                               |
| IBP TP7-f   | <chem>CC(C)CC6=CC=C(CC)C=C6O</chem>                                                 |
| IBP TP7-g   | <chem>CC(C)C(O)C1=CC=C(CC)C=C1</chem>                                               |
| IBP TP7-h   | <chem>CC(C)(O)CC2=CC=C(CC)C=C2</chem>                                               |
| IBP TP7-i   | <chem>CC(CO)CC3=CC=C(CC)C=C3</chem>                                                 |
| IBP TP7-j   | <chem>CC(CO)CC4=CC=C(CC)C=C4</chem>                                                 |
| IBP TP13    | <chem>O=C(CCCCC=O)O</chem>                                                          |
| IBP TP19-a  | <chem>CC(C)CC1=CC=C(C(C=O)(O)C(O)=O)C=C1O</chem>                                    |
| IBP TP19-b  | <chem>CC(C)CC2=C(O)C=C(C(C=O)(O)C(O)=O)C=C2</chem>                                  |
| IBP TP19-c  | <chem>CC(C)CC3=CC(O)=C(C(C=O)(O)C(O)=O)C=C3</chem>                                  |
| IBP TP19-d  | <chem>CC(C)CC4=CC=C(C(C=O)(O)C(O)=O)C(O)=C4</chem>                                  |
| IBP TP19-e  | <chem>CC(CO)CC1=CC=C(C(C=O)(O)C(O)=O)C=C1C</chem>                                   |
| IBP TP19-f  | <chem>CC(C)C(O)C2=CC=C(C(C=O)(O)C(O)=O)C=C2</chem>                                  |
| IBP TP19-g  | <chem>CC(C)(O)CC3=CC=C(C(C=O)(O)C(O)=O)C=C3</chem>                                  |
| IBP TP19-h  | <chem>CC(CO)CC4=CC=C(C(C=O)(O)C(O)=O)C=C4</chem>                                    |
| LOS         | <chem>OCC1=C(CI)N=C(CCCC)N1CC2=CC=C(C3=CC=CC=C3C4=NN=N4)C=C2</chem>                 |
| LOS TP1     | <chem>NCC1=CC=C(C2=CC=CC=C2C3=NN=NN3)C=C1</chem>                                    |
| LOS TP5-a   | <chem>OCC1=C(CI)N=C(CCCC)N1CC2=CC=C(C3=C(O)C=CC=C3C4=NN=NN4)C=C2</chem>             |
| LOS TP5-b   | <chem>OCC5=C(CI)N=C(CCCC)N5CC6=CC=C(C7=CC(O)=CC=C7C8=NN=NN8)C=C6</chem>             |
| LOS TP5-c   | <chem>OCC9=C(CI)N=C(CCCC)N9CC%10=CC=C(C%11=CC=C(O)C=C%11C%12=NN=NN%12)C=C%10</chem> |
| LOS TP5-d   | <chem>OCC1=C(CI)N=C(CCCC)N1CC2=CC=C(C3=CC=CC(O)=C3C4=NN=NN4)C=C2</chem>             |
| LOS TP10    | <chem>O=CC1=C(CI)N=C(CCCC)N1CC2=CC=C(C3=CC=CC=C3C4=NN=NN4)C=C2</chem>               |
| LOS TP11    | <chem>OCC1=C(CI)N=C(CC(O)CC)N1CC2=CC=C(C3=CC=CC=C3C4=NN=NN4)C=C2</chem>             |
| LOS TP14    | <chem>OC(CN(CC1=CC=C(C2=CC=CC=C2C3=NN=NN3)C=C1)C(CCCC)=O)=O</chem>                  |
| LOS TP15-a  | <chem>OCC1=C(CI)N=C(CCCC)N1CC2=CC=C(C3=C(O)C=CC=C3C4=NN=NN4)C=C2</chem>             |
| LOS TP15-b  | <chem>OCC5=C(CI)N=C(CCCC)N5CC6=CC=C(C7=CC(O)=CC=C7C8=NN=NN8)C=C6</chem>             |
| LOS TP15-c  | <chem>OCC9=C(CI)N=C(CCCC)N9CC%10=CC=C(C%11=CC=C(O)C=C%11C%12=NN=NN%12)C=C%10</chem> |
| LOS TP15-d  | <chem>OCC1=C(CI)N=C(CCCC)N1CC2=CC=C(C3=CC=CC(O)=C3C4=NN=NN4)C=C2</chem>             |
| NMS         | <chem>CS(=O)(NC1=CC=C([N+])([O-])=O)C=C1OC2=CC=CC=C2)=O</chem>                      |
| NMS TP1 I   | <chem>CS(=O)(NC1=C(O)C=C([N+])([O-])=O)C=C1OC2=CC=CC=C2)=O</chem>                   |
| NMS TP1 II  | <chem>CS(=O)(NC1=CC=C([N+])([O-])=O)C(O)=C1OC2=CC=CC=C2)=O</chem>                   |
| NMS TP1 III | <chem>CS(=O)(NC1=CC=C([N+])([O-])=O)C=C1OC2=CC=CC(O)=C2)=O</chem>                   |
| PCT         | <chem>CC(NC1=CC=C(O)C=C1)=O</chem>                                                  |
| PCT TP2     | <chem>OCNC1=CC=C(O)C=C1</chem>                                                      |
| PCT TP9-a   | <chem>CC(NC1=CC=C(O)C=C1O)=O</chem>                                                 |
| PCT TP9-b   | <chem>CC(NC2=CC=C(O)C(O)=C2)=O</chem>                                               |
| PCT TP9-c   | <chem>CC(NC3=CC(O)=C(O)C=C3)=O</chem>                                               |
| PCT TP9-d   | <chem>CC(NC4=C(O)C=C(O)C=C4)=O</chem>                                               |

**Text S2.** Proposed chemical structures of the compounds evaluated by *in silico* predictions.

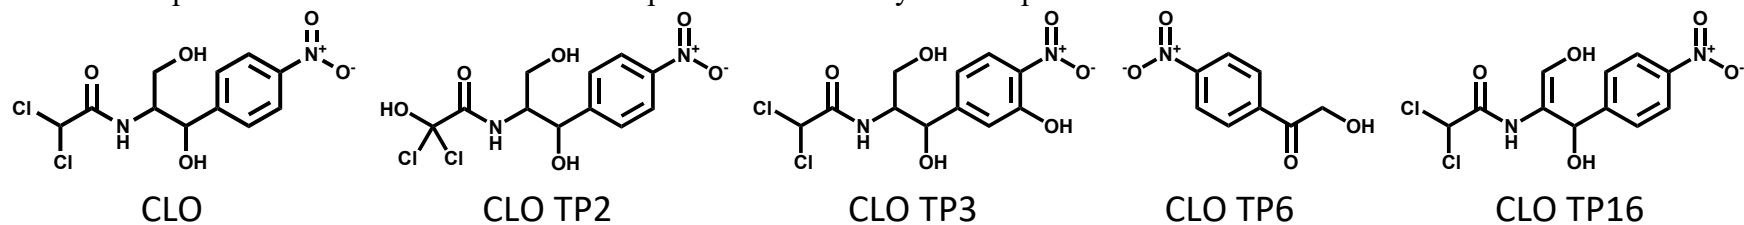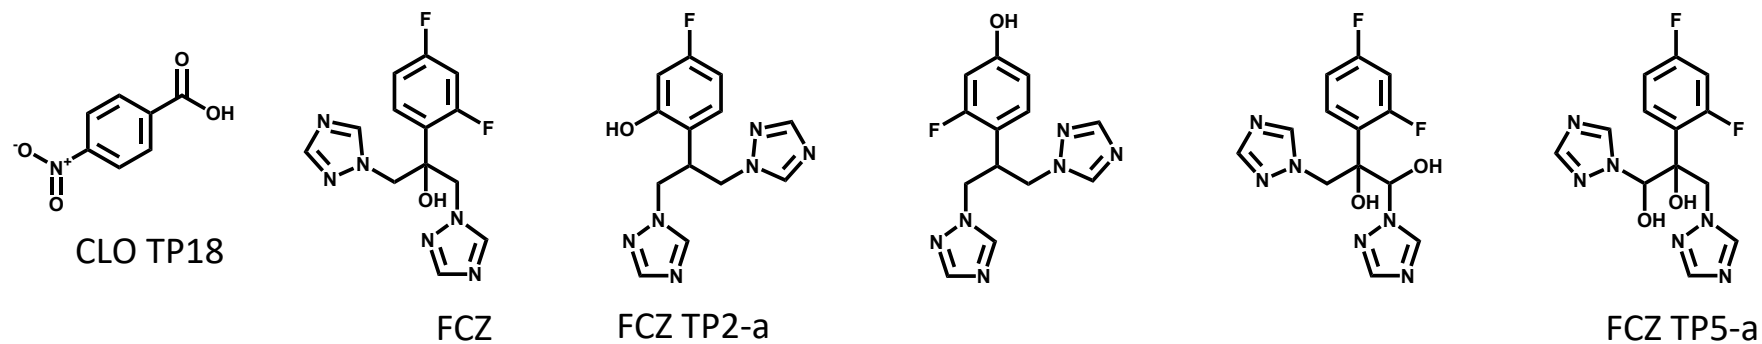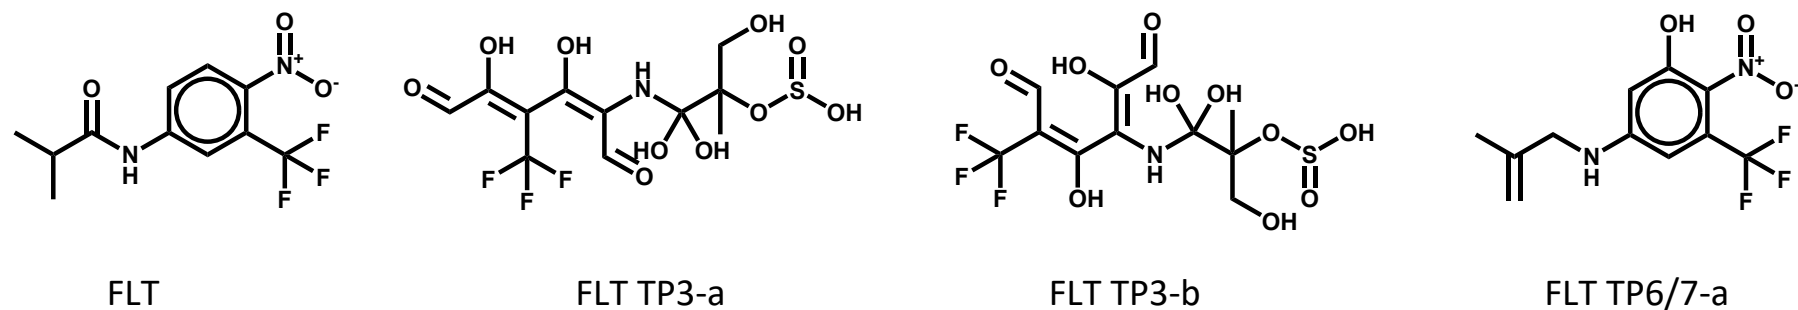

**Figure S1.** Proposed chemical structures of pharmaceuticals and TPs (considering some constitutional isomers of TPs) evaluated by *in silico* predictions.

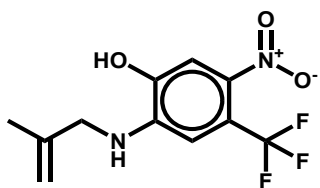

FLT TP6/7-b

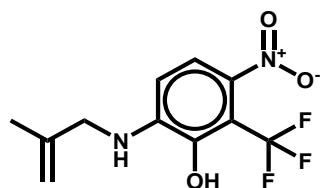

FLT TP6/7-c

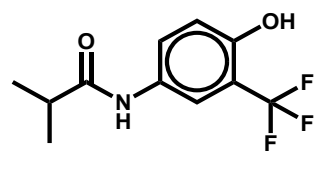

FLT TP8-a

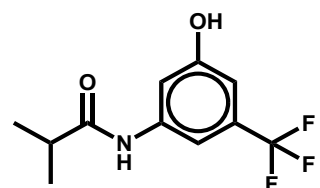

FLT TP8-b

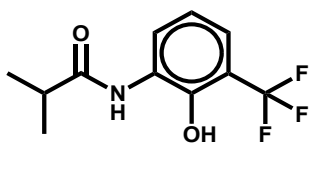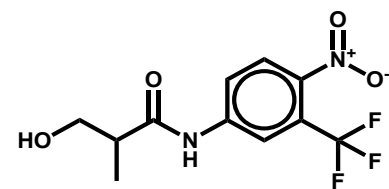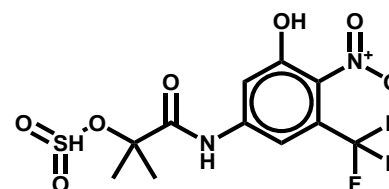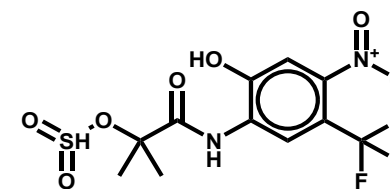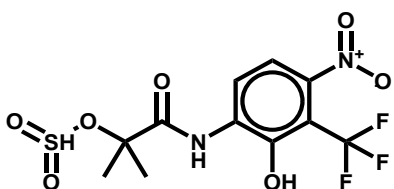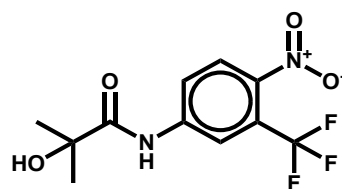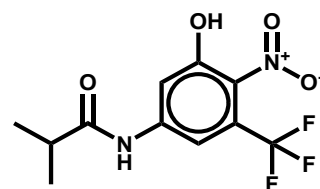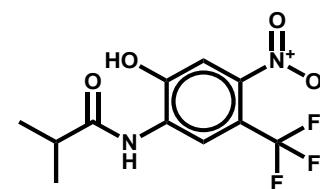

**Figure S2.** Proposed chemical structures of pharmaceuticals and TPs (considering some constitutional isomers of TPs) evaluated by *in silico* predictions.

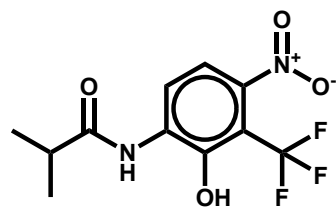

FLT TP13-c

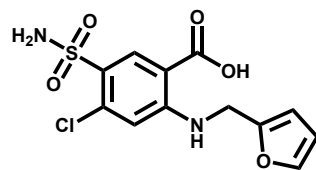

FRS

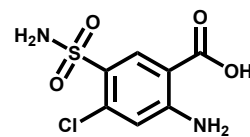

FRS TP3

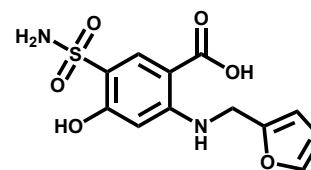

FRS TP12-a

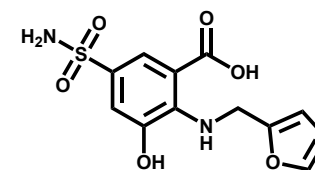

FRS TP12-b

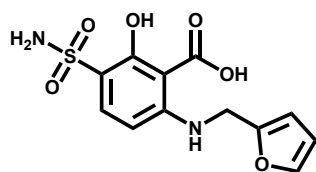

FRS TP12-c

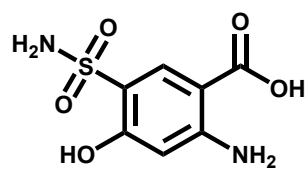

FRS TP14-a

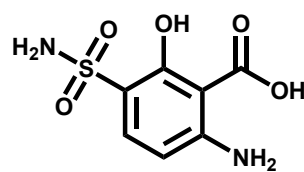

FRS TP14-c

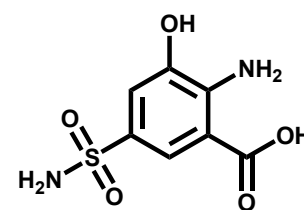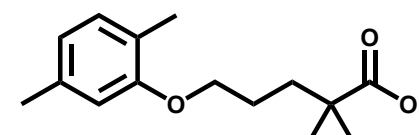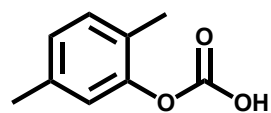

GFZ TP8

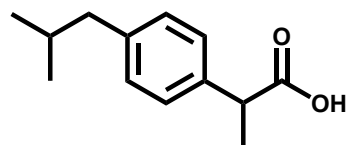

IBP

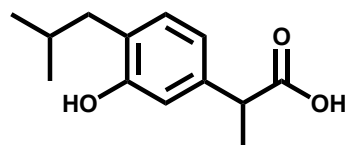

IBP TP4-a

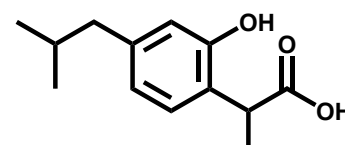

IBP TP4-b

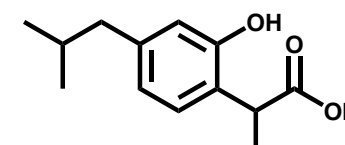

IBP TP4-c

**Figure S3.** Proposed chemical structures of pharmaceuticals and TPs (considering some constitutional isomers of TPs) evaluated by *in silico* predictions.

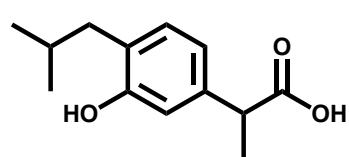

IBP TP4-  
4507

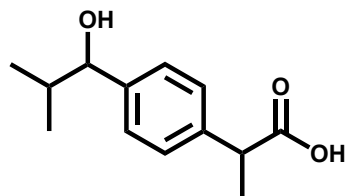

IBP TP4-  
4517

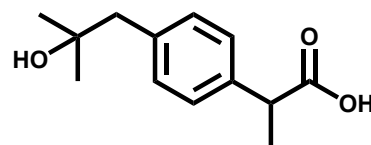

IBP TP4-  
4507

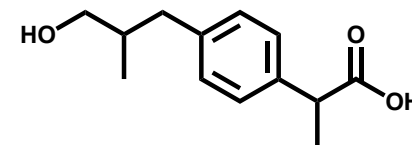

IBP TP4-  
4507

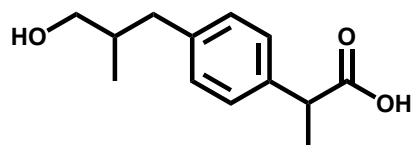

LOS

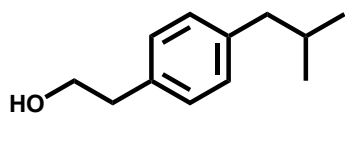

IBP TP7-a

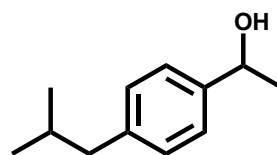

IBP TP7-bFLT  
TP7-b

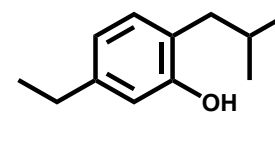

IBP TP13IBP

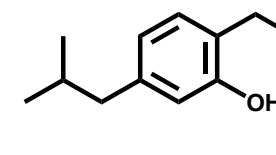

LOS

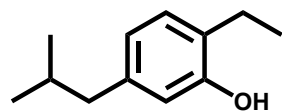

LOS

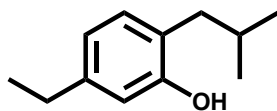

LOS

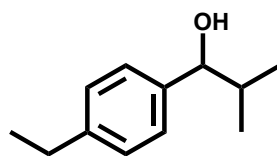

IBP TP19-

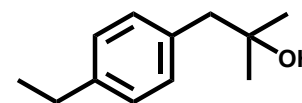

IBP TP19-eIBP

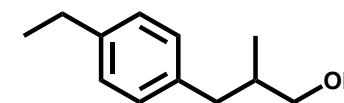

IBP TP19-

**Figure S4.** Proposed chemical structures of pharmaceuticals and TPs (considering some constitutional isomers of TPs) evaluated by *in silico* predictions.

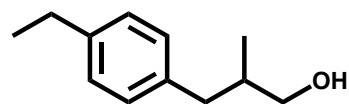

IBP TP7-j

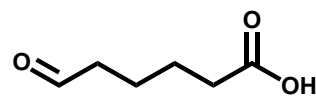

TP7-cFLT TP9

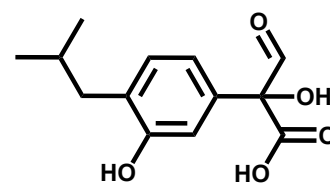

IBP TP19-a

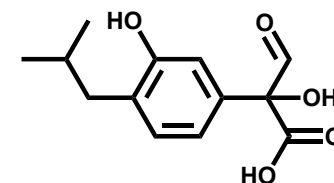

IBP TP19-b

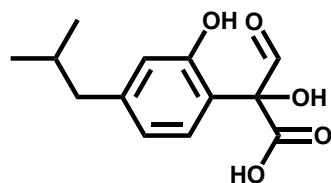

cIBP TP7-gFLT  
TD11

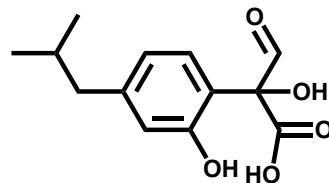

dIBP TP7-iFLT  
TD12

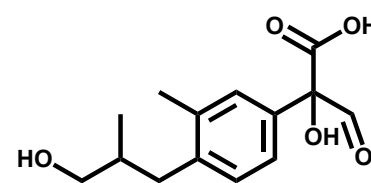

TP7-hFLT TP13-  
h

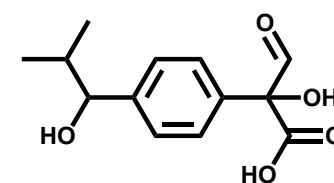

IBP TP19-f

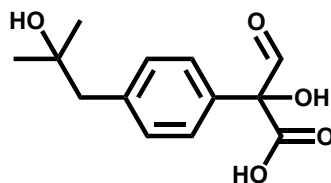

IBP TP19-g

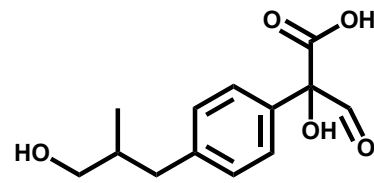

IBP TP19-h

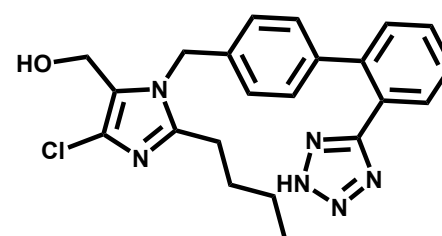

LOS

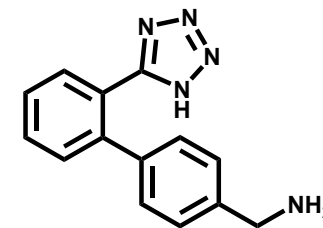

LOS TP1

**Figure S5.** Proposed chemical structures of pharmaceuticals and TPs (considering some constitutional isomers of TPs) evaluated by *in silico* predictions.



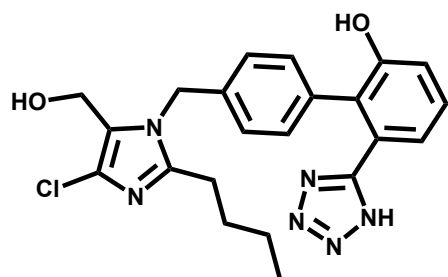

LOS TP5/15-a

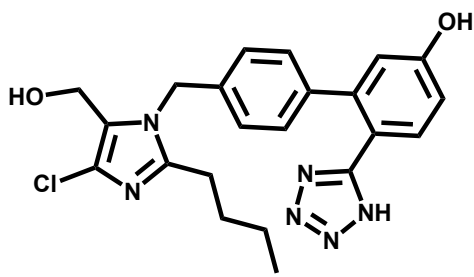

LOS TP5/15-b

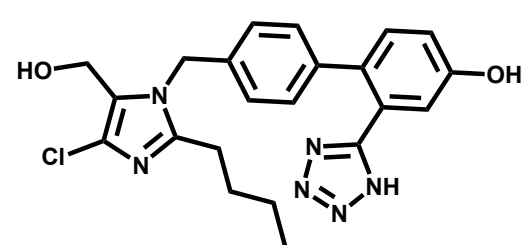

LOS TP5/15-c

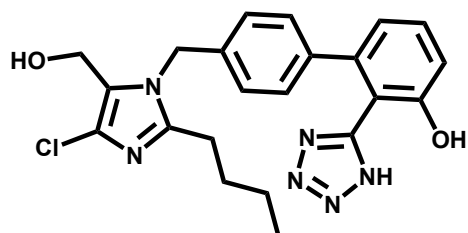

TP5/15-dIBP

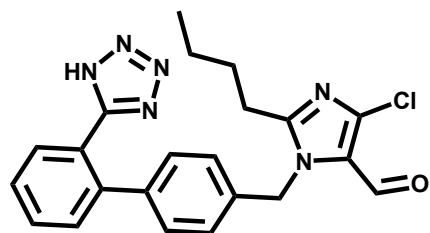

TP10IBP

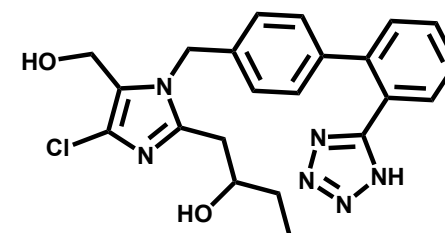

TP11IBP

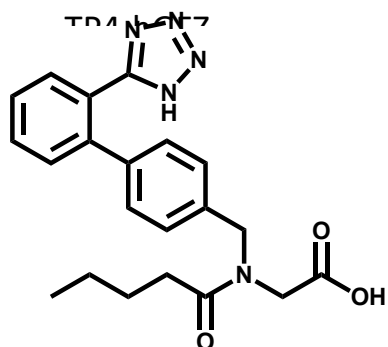

TP14IBP

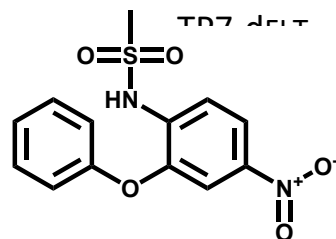

NMS

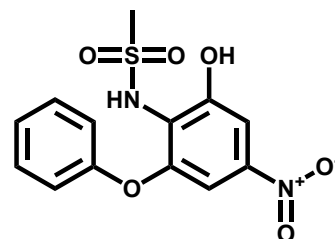

NMS TP1 I

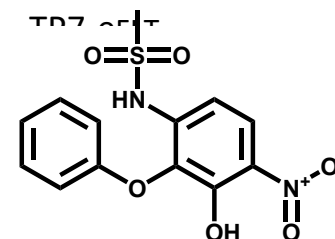

NMS TP1 II

**Figure S6.** Proposed chemical structures of pharmaceuticals and TPs (considering some constitutional isomers of TPs) evaluated by *in silico* predictions.

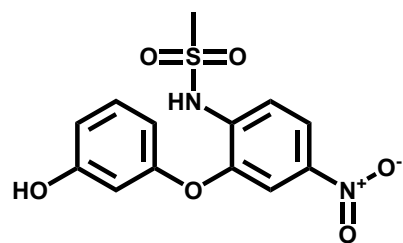

NMS TP1 III

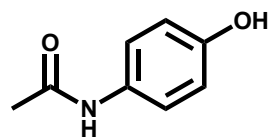

PCT

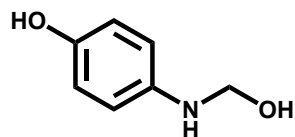

PCT TP2

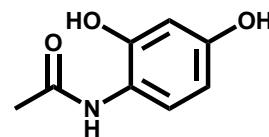

PCT TP9-a

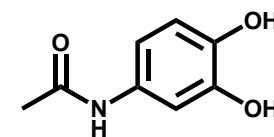

PCT TP9-b

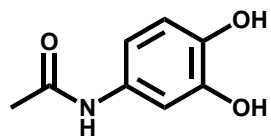

PCT TP9-c

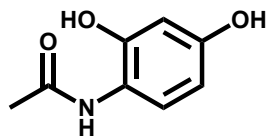

PCT TP9-d

**Figure S7.** Proposed chemical structures of pharmaceuticals and TPs (considering some constitutional isomers of TPs) evaluated by *in silico* predictions.

**Text S3.**Normalized data for chemometric analyzes for HCA and PCA.

**Table S1.** Normalized data for chemometric analyzes for HCA and PCA.

| Composto     | BIODEGRADABILITY |      |      |      |      |      |      |      | MUTAGENICITY |      |      |      |      |      |      |      |      |      | CARCINOGENICITY |      |      |      |      | PBT  |      |
|--------------|------------------|------|------|------|------|------|------|------|--------------|------|------|------|------|------|------|------|------|------|-----------------|------|------|------|------|------|------|
|              | BA               | BB   | BC   | BD   | BE   | BF   | BG   | BH   | MA           | MB   | MC   | MD   | ME   | MF   | MG   | MG   | MI   | MJ   | MK              | CA   | CB   | CC   | CD   |      | CE   |
| CLO          | 0.00             | 1.00 | 1.00 | 0.00 | 1.00 | 1.00 | 1.00 | 1.00 | 2.00         | 3.00 | 2.00 | 0.00 | 3.00 | 2.00 | 2.00 | 2.00 | 2.00 | 4.00 | 0.00            | 2.00 | 0.00 | 6.00 | 2.00 | 2.00 | 0.00 |
| CLO TP2      | 1.00             | 1.00 | 1.00 | 0.00 | 1.00 | 1.00 | 1.00 | 1.00 | 1.00         | 2.00 | 2.00 | 0.00 | 3.00 | 2.00 | 2.00 | 1.00 | 1.00 | 4.00 | 0.00            | 1.00 | 0.00 | 6.00 | 3.00 | 1.00 | 0.00 |
| CLO TP3      | 0.00             | 1.00 | 1.00 | 0.00 | 1.00 | 1.00 | 1.00 | 1.00 | 2.00         | 3.00 | 0.00 | 0.00 | 3.00 | 2.00 | 3.00 | 2.00 | 2.00 | 4.00 | 0.00            | 2.00 | 0.00 | 7.00 | 2.00 | 2.00 | 0.00 |
| CLO TP6      | 0.00             | 1.00 | 0.00 | 0.00 | 1.00 | 1.00 | 1.00 | 1.00 | 1.00         | 2.00 | 2.00 | 0.00 | 3.00 | 1.00 | 2.00 | 2.00 | 3.00 | 2.00 | 1.00            | 1.00 | 0.00 | 4.00 | 3.00 | 1.00 | 0.00 |
| CLO TP16     | 0.00             | 1.00 | 1.00 | 0.00 | 1.00 | 1.00 | 1.00 | 1.00 | 3.00         | 3.00 | 2.00 | 0.00 | 2.00 | 2.00 | 2.00 | 1.00 | 1.00 | 4.00 | 0.00            | 3.00 | 0.00 | 6.00 | 2.00 | 3.00 | 0.00 |
| CPC TP18     | 0.00             | 0.00 | 0.00 | 0.00 | 1.00 | 1.00 | 0.00 | 1.00 | 1.00         | 1.00 | 2.00 | 0.00 | 1.00 | 1.00 | 1.00 | 1.00 | 1.00 | 2.00 | 1.00            | 1.00 | 0.00 | 4.00 | 2.00 | 1.00 | 0.00 |
| FCZ          | 1.00             | 1.00 | 1.00 | 0.00 | 1.00 | 1.00 | 1.00 | 1.00 | 0.00         | 1.00 | 0.00 | 0.00 | 0.00 | 0.00 | 0.00 | 0.00 | 0.00 | 0.00 | 1.00            | 0.00 | 1.00 | 2.00 | 0.00 | 0.00 | 0.00 |
| FCZ TP2-a    | 1.00             | 1.00 | 1.00 | 0.00 | 1.00 | 1.00 | 1.00 | 1.00 | 0.00         | 1.00 | 0.00 | 0.00 | 0.00 | 0.00 | 0.00 | 0.00 | 0.00 | 0.00 | 1.00            | 1.00 | 1.00 | 2.00 | 0.00 | 1.00 | 0.00 |
| FCZ TP2-b    | 1.00             | 1.00 | 1.00 | 0.00 | 1.00 | 1.00 | 1.00 | 1.00 | 0.00         | 1.00 | 0.00 | 0.00 | 0.00 | 0.00 | 0.00 | 0.00 | 0.00 | 0.00 | 1.00            | 1.00 | 1.00 | 2.00 | 0.00 | 1.00 | 0.00 |
| FCZ TP5-a    | 1.00             | 1.00 | 1.00 | 0.00 | 1.00 | 1.00 | 1.00 | 1.00 | 0.00         | 1.00 | 0.00 | 0.00 | 0.00 | 0.00 | 0.00 | 0.00 | 0.00 | 0.00 | 1.00            | 0.00 | 1.00 | 2.00 | 1.00 | 0.00 | 0.00 |
| FCZ TP5-b    | 1.00             | 1.00 | 1.00 | 0.00 | 1.00 | 1.00 | 1.00 | 1.00 | 0.00         | 1.00 | 0.00 | 0.00 | 0.00 | 0.00 | 0.00 | 0.00 | 0.00 | 0.00 | 1.00            | 0.00 | 1.00 | 2.00 | 1.00 | 0.00 | 0.00 |
| FLUT         | 1.00             | 1.00 | 1.00 | 0.00 | 1.00 | 1.00 | 1.00 | 1.00 | 1.00         | 1.00 | 2.00 | 0.00 | 0.00 | 0.00 | 0.00 | 1.00 | 1.00 | 2.00 | 0.00            | 1.00 | 0.00 | 5.00 | 2.00 | 1.00 | 0.00 |
| FLUT TP3-a   | 0.00             | 0.00 | 1.00 | 0.00 | 0.00 | 1.00 | 0.00 | 1.00 | 1.00         | 2.00 | 0.00 | 0.00 | 1.00 | 1.00 | 1.00 | 0.00 | 1.00 | 1.00 | 0.00            | 1.00 | 0.00 | 3.00 | 1.00 | 1.00 | 0.00 |
| FLUT TP3-b   | 0.00             | 0.00 | 1.00 | 0.00 | 0.00 | 1.00 | 0.00 | 1.00 | 1.00         | 2.00 | 0.00 | 0.00 | 1.00 | 1.00 | 1.00 | 0.00 | 1.00 | 1.00 | 1.00            | 1.00 | 0.00 | 3.00 | 2.00 | 1.00 | 0.00 |
| FLUT TP6-7-a | 1.00             | 1.00 | 1.00 | 0.00 | 1.00 | 1.00 | 1.00 | 1.00 | 0.00         | 1.00 | 0.00 | 0.00 | 1.00 | 0.00 | 0.00 | 1.00 | 1.00 | 2.00 | 0.00            | 0.00 | 0.00 | 6.00 | 3.00 | 1.00 | 0.00 |
| FLUT TP6-7-b | 1.00             | 1.00 | 1.00 | 0.00 | 1.00 | 1.00 | 1.00 | 1.00 | 0.00         | 2.00 | 2.00 | 0.00 | 1.00 | 0.00 | 0.00 | 1.00 | 1.00 | 2.00 | 1.00            | 1.00 | 0.00 | 6.00 | 3.00 | 1.00 | 1.00 |
| FLUT TP6-7-c | 1.00             | 1.00 | 1.00 | 0.00 | 1.00 | 1.00 | 1.00 | 1.00 | 0.00         | 2.00 | 2.00 | 0.00 | 1.00 | 0.00 | 0.00 | 1.00 | 1.00 | 2.00 | 1.00            | 1.00 | 0.00 | 6.00 | 3.00 | 1.00 | 1.00 |
| FLUT TP8-a   | 1.00             | 1.00 | 1.00 | 0.00 | 1.00 | 1.00 | 1.00 | 1.00 | 0.00         | 0.00 | 0.00 | 2.00 | 0.00 | 0.00 | 0.00 | 0.00 | 0.00 | 0.00 | 0.00            | 0.00 | 0.00 | 1.00 | 2.00 | 0.00 | 0.00 |
| FLUT TP8-b   | 1.00             | 1.00 | 1.00 | 0.00 | 1.00 | 1.00 | 1.00 | 1.00 | 0.00         | 0.00 | 0.00 | 0.00 | 0.00 | 0.00 | 0.00 | 0.00 | 0.00 | 0.00 | 0.00            | 0.00 | 0.00 | 1.00 | 2.00 | 0.00 | 0.00 |
| FLUT TP8-c   | 1.00             | 1.00 | 1.00 | 0.00 | 1.00 | 1.00 | 1.00 | 1.00 | 0.00         | 1.00 | 0.00 | 2.00 | 0.00 | 0.00 | 0.00 | 0.00 | 0.00 | 0.00 | 0.00            | 0.00 | 0.00 | 2.00 | 2.00 | 0.00 | 0.00 |
| FLUT TP8-d   | 1.00             | 1.00 | 1.00 | 0.00 | 1.00 | 1.00 | 1.00 | 1.00 | 0.00         | 1.00 | 0.00 | 0.00 | 0.00 | 0.00 | 0.00 | 0.00 | 0.00 | 0.00 | 0.00            | 0.00 | 0.00 | 2.00 | 2.00 | 0.00 | 0.00 |
| FLUT TP-9    | 1.00             | 1.00 | 1.00 | 0.00 | 1.00 | 1.00 | 1.00 | 1.00 | 1.00         | 2.00 | 2.00 | 0.00 | 0.00 | 0.00 | 0.00 | 1.00 | 1.00 | 2.00 | 0.00            | 1.00 | 1.00 | 5.00 | 2.00 | 1.00 | 0.00 |
| FLUT TP10-a  | 1.00             | 1.00 | 1.00 | 0.00 | 1.00 | 1.00 | 1.00 | 1.00 | 0.00         | 1.00 | 0.00 | 0.00 | 0.00 | 0.00 | 0.00 | 1.00 | 1.00 | 2.00 | 1.00            | 0.00 | 1.00 | 7.00 | 3.00 | 1.00 | 0.00 |
| FLUT TP10-b  | 1.00             | 1.00 | 1.00 | 0.00 | 1.00 | 1.00 | 1.00 | 1.00 | 1.00         | 2.00 | 2.00 | 2.00 | 0.00 | 0.00 | 0.00 | 1.00 | 1.00 | 2.00 | 1.00            | 1.00 | 1.00 | 7.00 | 3.00 | 1.00 | 0.00 |

| Composto    | BIODEGRADABILITY |      |      |      |      |      |      |      | MUTAGENICITY |      |      |      |      |      |      |      |      |      |      | CARCINOGENICITY |      |      |      |      | PBT  |
|-------------|------------------|------|------|------|------|------|------|------|--------------|------|------|------|------|------|------|------|------|------|------|-----------------|------|------|------|------|------|
|             | BA               | BB   | BC   | BD   | BE   | BF   | BG   | BH   | MA           | MB   | MC   | MD   | ME   | MF   | MG   | MG   | MI   | MJ   | MK   | CA              | CB   | CC   | CD   | CE   |      |
| FLUT TP10-c | 1.00             | 1.00 | 1.00 | 0.00 | 1.00 | 1.00 | 1.00 | 1.00 | 1.00         | 2.00 | 2.00 | 2.00 | 1.00 | 0.00 | 0.00 | 1.00 | 1.00 | 2.00 | 1.00 | 1.00            | 1.00 | 7.00 | 3.00 | 1.00 | 0.00 |
| FLUT TP11   | 1.00             | 1.00 | 1.00 | 0.00 | 1.00 | 1.00 | 1.00 | 1.00 | 1.00         | 1.00 | 2.00 | 0.00 | 1.00 | 0.00 | 0.00 | 1.00 | 1.00 | 2.00 | 0.00 | 1.00            | 1.00 | 5.00 | 2.00 | 1.00 | 0.00 |
| FLUT TP13-a | 1.00             | 1.00 | 1.00 | 0.00 | 1.00 | 1.00 | 1.00 | 1.00 | 1.00         | 0.00 | 1.00 | 0.00 | 0.00 | 0.00 | 0.00 | 1.00 | 1.00 | 2.00 | 0.00 | 0.00            | 1.00 | 6.00 | 2.00 | 1.00 | 0.00 |
| FLUT TP13-b | 1.00             | 1.00 | 1.00 | 0.00 | 1.00 | 1.00 | 1.00 | 1.00 | 1.00         | 1.00 | 2.00 | 2.00 | 0.00 | 0.00 | 0.00 | 1.00 | 1.00 | 2.00 | 1.00 | 1.00            | 1.00 | 6.00 | 2.00 | 1.00 | 0.00 |
| FLUT TP13-c | 1.00             | 1.00 | 1.00 | 0.00 | 1.00 | 1.00 | 1.00 | 1.00 | 1.00         | 1.00 | 2.00 | 2.00 | 0.00 | 0.00 | 0.00 | 1.00 | 1.00 | 2.00 | 1.00 | 1.00            | 1.00 | 6.00 | 2.00 | 1.00 | 0.00 |
| FRS         | 1.00             | 1.00 | 1.00 | 0.00 | 1.00 | 1.00 | 1.00 | 1.00 | 1.00         | 0.00 | 1.00 | 0.00 | 0.00 | 0.00 | 0.00 | 0.00 | 0.00 | 0.00 | 0.00 | 2.00            | 0.00 | 2.00 | 3.00 | 2.00 | 0.00 |
| FRS TP3     | 1.00             | 1.00 | 1.00 | 0.00 | 1.00 | 1.00 | 1.00 | 1.00 | 1.00         | 0.00 | 1.00 | 0.00 | 0.00 | 0.00 | 0.00 | 0.00 | 0.00 | 0.00 | 0.00 | 1.00            | 0.00 | 1.00 | 2.00 | 2.00 | 0.00 |
| FRS TP12-a  | 0.00             | 0.00 | 1.00 | 0.00 | 1.00 | 1.00 | 1.00 | 0.00 | 0.00         | 1.00 | 0.00 | 0.00 | 0.00 | 0.00 | 0.00 | 0.00 | 0.00 | 0.00 | 0.00 | 1.00            | 0.00 | 2.00 | 2.00 | 1.00 | 0.00 |
| FRS TP12-b  | 0.00             | 0.00 | 1.00 | 0.00 | 1.00 | 1.00 | 1.00 | 0.00 | 0.00         | 1.00 | 0.00 | 0.00 | 0.00 | 0.00 | 0.00 | 0.00 | 0.00 | 0.00 | 0.00 | 1.00            | 0.00 | 3.00 | 2.00 | 1.00 | 0.00 |
| FRS TP12-c  | 0.00             | 0.00 | 1.00 | 0.00 | 1.00 | 1.00 | 1.00 | 0.00 | 0.00         | 1.00 | 0.00 | 1.00 | 0.00 | 0.00 | 0.00 | 0.00 | 0.00 | 0.00 | 0.00 | 1.00            | 0.00 | 2.00 | 3.00 | 1.00 | 0.00 |
| FRS TP14-a  | 0.00             | 0.00 | 1.00 | 0.00 | 1.00 | 1.00 | 0.00 | 0.00 | 0.00         | 1.00 | 0.00 | 0.00 | 0.00 | 0.00 | 0.00 | 0.00 | 0.00 | 0.00 | 0.00 | 1.00            | 0.00 | 1.00 | 1.00 | 1.00 | 0.00 |
| FRS TP14-b  | 0.00             | 0.00 | 1.00 | 0.00 | 1.00 | 1.00 | 0.00 | 0.00 | 0.00         | 1.00 | 0.00 | 0.00 | 0.00 | 0.00 | 0.00 | 0.00 | 0.00 | 0.00 | 0.00 | 1.00            | 0.00 | 1.00 | 2.00 | 1.00 | 0.00 |
| FRS TP14-c  | 0.00             | 0.00 | 1.00 | 0.00 | 1.00 | 1.00 | 0.00 | 0.00 | 0.00         | 1.00 | 0.00 | 0.00 | 0.00 | 0.00 | 0.00 | 0.00 | 0.00 | 0.00 | 0.00 | 1.00            | 0.00 | 2.00 | 1.00 | 1.00 | 0.00 |
| GFZ         | 0.00             | 0.00 | 1.00 | 0.00 | 0.00 | 1.00 | 1.00 | 1.00 | 1.00         | 0.00 | 0.00 | 0.00 | 0.00 | 0.00 | 0.00 | 0.00 | 0.00 | 0.00 | 0.00 | 1.00            | 0.00 | 0.00 | 0.00 | 1.00 | 0.00 |
| GFZ TP8     | 0.00             | 0.00 | 1.00 | 0.00 | 1.00 | 1.00 | 1.00 | 0.00 | 0.00         | 0.00 | 0.00 | 0.00 | 0.00 | 0.00 | 0.00 | 0.00 | 0.00 | 0.00 | 0.00 | 0.00            | 0.00 | 0.00 | 0.00 | 0.00 | 0.00 |
| IBP         | 0.00             | 0.00 | 0.00 | 0.00 | 1.00 | 0.00 | 1.00 | 1.00 | 1.00         | 0.00 | 0.00 | 1.00 | 0.00 | 0.00 | 0.00 | 0.00 | 0.00 | 0.00 | 0.00 | 0.00            | 0.00 | 0.00 | 1.00 | 0.00 | 0.00 |
| IBP TP4-a   | 0.00             | 0.00 | 0.00 | 0.00 | 0.00 | 0.00 | 0.00 | 1.00 | 0.00         | 0.00 | 0.00 | 1.00 | 0.00 | 0.00 | 0.00 | 0.00 | 0.00 | 0.00 | 0.00 | 0.00            | 0.00 | 0.00 | 1.00 | 0.00 | 0.00 |
| IBP TP4-b   | 0.00             | 0.00 | 0.00 | 0.00 | 0.00 | 1.00 | 1.00 | 1.00 | 0.00         | 0.00 | 0.00 | 1.00 | 0.00 | 0.00 | 0.00 | 0.00 | 0.00 | 0.00 | 0.00 | 0.00            | 0.00 | 0.00 | 1.00 | 0.00 | 0.00 |
| IBP TP4-c   | 0.00             | 0.00 | 0.00 | 0.00 | 0.00 | 1.00 | 1.00 | 1.00 | 0.00         | 0.00 | 0.00 | 1.00 | 0.00 | 0.00 | 0.00 | 0.00 | 0.00 | 0.00 | 0.00 | 0.00            | 0.00 | 0.00 | 1.00 | 0.00 | 0.00 |
| IBP TP4-d   | 0.00             | 0.00 | 0.00 | 0.00 | 0.00 | 1.00 | 1.00 | 1.00 | 0.00         | 0.00 | 0.00 | 1.00 | 0.00 | 0.00 | 0.00 | 0.00 | 0.00 | 0.00 | 0.00 | 0.00            | 0.00 | 0.00 | 1.00 | 0.00 | 0.00 |
| IBP TP4-e   | 0.00             | 0.00 | 0.00 | 0.00 | 0.00 | 1.00 | 1.00 | 1.00 | 0.00         | 0.00 | 0.00 | 0.00 | 0.00 | 0.00 | 0.00 | 0.00 | 0.00 | 0.00 | 0.00 | 0.00            | 0.00 | 0.00 | 1.00 | 0.00 | 0.00 |
| IBP TP4-f   | 0.00             | 0.00 | 0.00 | 0.00 | 0.00 | 1.00 | 1.00 | 1.00 | 0.00         | 0.00 | 0.00 | 0.00 | 0.00 | 0.00 | 0.00 | 0.00 | 0.00 | 0.00 | 0.00 | 0.00            | 0.00 | 0.00 | 1.00 | 0.00 | 0.00 |
| IBP TP4-g   | 0.00             | 0.00 | 0.00 | 0.00 | 0.00 | 1.00 | 1.00 | 1.00 | 0.00         | 0.00 | 0.00 | 0.00 | 0.00 | 0.00 | 0.00 | 0.00 | 0.00 | 0.00 | 0.00 | 0.00            | 0.00 | 0.00 | 1.00 | 0.00 | 0.00 |
| IBP TP4-h   | 0.00             | 0.00 | 1.00 | 0.00 | 0.00 | 1.00 | 1.00 | 1.00 | 0.00         | 0.00 | 0.00 | 0.00 | 0.00 | 0.00 | 0.00 | 0.00 | 0.00 | 0.00 | 0.00 | 0.00            | 0.00 | 0.00 | 1.00 | 0.00 | 0.00 |
| IBP TP7-a   | 0.00             | 0.00 | 0.00 | 0.00 | 0.00 | 1.00 | 1.00 | 1.00 | 0.00         | 0.00 | 0.00 | 0.00 | 0.00 | 0.00 | 0.00 | 0.00 | 0.00 | 0.00 | 0.00 | 0.00            | 0.00 | 0.00 | 1.00 | 0.00 | 0.00 |
| IBP TP7-b   | 0.00             | 0.00 | 0.00 | 0.00 | 0.00 | 1.00 | 1.00 | 1.00 | 0.00         | 0.00 | 0.00 | 0.00 | 0.00 | 0.00 | 0.00 | 0.00 | 0.00 | 0.00 | 0.00 | 0.00            | 0.00 | 0.00 | 0.00 | 0.00 | 0.00 |
| IBP TP7-c   | 0.00             | 0.00 | 0.00 | 0.00 | 1.00 | 1.00 | 1.00 | 1.00 | 0.00         | 0.00 | 0.00 | 1.00 | 0.00 | 0.00 | 0.00 | 0.00 | 0.00 | 0.00 | 0.00 | 0.00            | 0.00 | 0.00 | 0.00 | 0.00 | 0.00 |



| Composto    | BIODEGRADABILITY |      |      |      |      |      |      |      | MUTAGENICITY |      |      |      |      |      |      |      |      |      | CARCINOGENICITY |      |      |      |      | PBT  |      |
|-------------|------------------|------|------|------|------|------|------|------|--------------|------|------|------|------|------|------|------|------|------|-----------------|------|------|------|------|------|------|
|             | BA               | BB   | BC   | BD   | BE   | BF   | BG   | BH   | MA           | MB   | MC   | MD   | ME   | MF   | MG   | MG   | MI   | MJ   | MK              | CA   | CB   | CC   | CD   |      | CE   |
| LOS TP15-c  | 0.00             | 1.00 | 1.00 | 0.00 | 1.00 | 1.00 | 1.00 | 1.00 | 0.00         | 1.00 | 0.00 | 1.00 | 0.00 | 0.00 | 0.00 | 0.00 | 0.00 | 0.00 | 0.00            | 0.00 | 1.00 | 0.00 | 1.00 | 0.00 | 0.00 |
| LOS TP15-d  | 0.00             | 1.00 | 1.00 | 0.00 | 1.00 | 1.00 | 1.00 | 1.00 | 0.00         | 1.00 | 0.00 | 1.00 | 0.00 | 0.00 | 0.00 | 0.00 | 0.00 | 0.00 | 0.00            | 0.00 | 1.00 | 0.00 | 1.00 | 0.00 | 0.00 |
| NMS         | 0.00             | 0.00 | 1.00 | 0.00 | 1.00 | 1.00 | 1.00 | 1.00 | 1.00         | 3.00 | 0.00 | 0.00 | 1.00 | 1.00 | 1.00 | 1.00 | 1.00 | 2.00 | 1.00            | 1.00 | 1.00 | 5.00 | 1.00 | 1.00 | 0.00 |
| NMS TP1 I   | 0.00             | 0.00 | 1.00 | 0.00 | 1.00 | 1.00 | 1.00 | 1.00 | 1.00         | 3.00 | 0.00 | 0.00 | 1.00 | 1.00 | 1.00 | 1.00 | 1.00 | 2.00 | 1.00            | 1.00 | 0.00 | 5.00 | 1.00 | 1.00 | 0.00 |
| NMS TP1 II  | 0.00             | 0.00 | 1.00 | 0.00 | 1.00 | 1.00 | 1.00 | 1.00 | 1.00         | 3.00 | 0.00 | 0.00 | 0.00 | 0.00 | 1.00 | 1.00 | 1.00 | 2.00 | 1.00            | 1.00 | 1.00 | 5.00 | 1.00 | 1.00 | 0.00 |
| NMS TP1 III | 0.00             | 1.00 | 1.00 | 0.00 | 1.00 | 1.00 | 1.00 | 1.00 | 1.00         | 3.00 | 0.00 | 0.00 | 1.00 | 1.00 | 1.00 | 1.00 | 1.00 | 2.00 | 1.00            | 1.00 | 1.00 | 5.00 | 1.00 | 1.00 | 0.00 |
| PCT         | 0.00             | 0.00 | 0.00 | 0.00 | 1.00 | 1.00 | 1.00 | 0.00 | 1.00         | 0.00 | 0.00 | 2.00 | 0.00 | 0.00 | 0.00 | 0.00 | 1.00 | 0.00 | 0.00            | 1.00 | 0.00 | 0.00 | 1.00 | 1.00 | 0.00 |
| PCT TP2     | 0.00             | 0.00 | 0.00 | 0.00 | 1.00 | 1.00 | 1.00 | 0.00 | 0.00         | 1.00 | 1.00 | 0.00 | 1.00 | 1.00 | 0.00 | 0.00 | 1.00 | 1.00 | 1.00            | 1.00 | 0.00 | 0.00 | 1.00 | 1.00 | 0.00 |
| PCT TP9-a   | 0.00             | 0.00 | 0.00 | 0.00 | 1.00 | 1.00 | 1.00 | 0.00 | 1.00         | 2.00 | 0.00 | 0.00 | 1.00 | 1.00 | 0.00 | 1.00 | 1.00 | 0.00 | 1.00            | 1.00 | 0.00 | 1.00 | 1.00 | 1.00 | 0.00 |
| PCT TP9-b   | 0.00             | 0.00 | 0.00 | 0.00 | 1.00 | 1.00 | 1.00 | 0.00 | 1.00         | 2.00 | 0.00 | 0.00 | 1.00 | 1.00 | 1.00 | 1.00 | 1.00 | 0.00 | 1.00            | 1.00 | 0.00 | 1.00 | 1.00 | 1.00 | 0.00 |
| PCT TP9-c   | 0.00             | 0.00 | 0.00 | 0.00 | 1.00 | 1.00 | 1.00 | 0.00 | 1.00         | 2.00 | 0.00 | 0.00 | 1.00 | 1.00 | 1.00 | 1.00 | 1.00 | 0.00 | 1.00            | 0.00 | 0.00 | 1.00 | 1.00 | 1.00 | 0.00 |
| PCT TP9-d   | 0.00             | 0.00 | 0.00 | 0.00 | 1.00 | 1.00 | 1.00 | 0.00 | 1.00         | 2.00 | 0.00 | 0.00 | 1.00 | 1.00 | 0.00 | 1.00 | 1.00 | 0.00 | 1.00            | 0.00 | 0.00 | 1.00 | 1.00 | 1.00 | 0.00 |

Legends:

**0**: not positive(biodegradable or not mutagenic or not carcinogenic); **1**: positive( not biodegradable or mutagenic or carcinogenic); **BA**: BIOWIN-1; **BB**: BIOWIN-2; **BC**: BIOWIN-3; **BD**: BIOWIN-4; **BE**: BIOWIN-5; **BF**: BIOWIN-6; **BG**: BIOWIN-7; **BH**: Ready Biodegradability (IRFMN 1.0.9); **MA**: in vivo mutagenicity (Ames Test) alerts by ISS; **MB**: in vivo mutagenicity (Micronucleus) alerts by ISS; **MC**: DNA alerts for AMES, CA and MNT by OASIS; **MD**: Protein binding alerts for Chromosomal aberration by OASIS; **ME**: GT1 BMUT; **MF**: GT EXPERT; **MG**: PHARM BMUT; **MH**: Mutagenicity (Ames test) model (CAESAR) (version 2.1.13); **MI**: Mutagenicity (Ames test) model (ISS); **MJ**:Mutagenicity (Ames test) model (SarPy/IRFMN) (version 1.0.7); **MK**:Mutagenicity (Ames test) model (KNN/Read-Across) (version 1.0.0); **CA**:Carcinogenicity alerts by ISS; **CB**: Carcinogenicity model (CAESAR) (version 2.1.9); **CC**: Carcinogenicity model (IRFMN/Antares) (version 1.0.0); **CD**: Carcinogenicity model (IRFMN/ISSCANNACGX) (version 1.0.0); **CE**: Carcinogenicity model (ISS) (version 1.0.2); **PBT**: Persistence, Bioaccumulation and Toxicity.

Text S4.*In silico*(Q)SAR predictions

Table S2. Biodegradability values of pharmaceuticals and TPs provided by EPI Suite and VEGA HUB.

| Compound    | EPI Suite v 4.11 |               |               |               |               |          |               | VEGA HUB                     |
|-------------|------------------|---------------|---------------|---------------|---------------|----------|---------------|------------------------------|
|             | BIOWIN-1         | BIOWIN-2      | BIOWIN-3      | BIOWIN-4      | BIOWIN-5      | BIOWIN-6 | BIOWIN-7      | Ready Biodegradability Model |
| CLO         | <b>0.5940</b>    | 0.0538        | 2.2300        | 3.5400        | -0.0409       | 0.0007   | -0.3470       | PNRB                         |
| CLO TP2     | 0.4020           | 0.0008        | 1.9900        | <b>3.3600</b> | -0.1210       | 0.0002   | -0.5320       | PNRB                         |
| CLO TP3     | <b>0.7020</b>    | 0.1010        | 2.2600        | <b>3.5500</b> | -0.0283       | 0.0007   | -0.1880       | PNRB                         |
| CLO TP6     | <b>0.5220</b>    | 0.1970        | <b>2.7700</b> | <b>3.5900</b> | 0.2920        | 0.0542   | 0.0072        | PNRB                         |
| CLO TP16    | <b>0.5950</b>    | 0.0553        | 2.2400        | <b>3.5400</b> | -0.0042       | 0.0007   | -0.2980       | PNRB                         |
| CLO TP18    | <b>0.5400</b>    | 0.6340        | <b>2.7500</b> | <b>3.5100</b> | 0.4470        | 0.1570   | <b>0.5060</b> | PNRB                         |
| FCZ         | -1.2000          | 0.0000        | 1.5000        | <b>3.2800</b> | 0.1150        | 0.0000   | -0.1140       | NRB                          |
| FCZ TP2-a   | -0.0292          | 0.0000        | 2.1400        | <b>3.4200</b> | 0.1170        | 0.0003   | 0.2190        | NRB                          |
| FCZ TP2-b   | -0.0292          | 0.0000        | 2.1400        | <b>3.4200</b> | 0.1170        | 0.0003   | 0.2190        | NRB                          |
| FCZ TP5-a   | -1.0500          | 0.0000        | 1.6200        | <b>3.3900</b> | 0.1350        | 0.0000   | -0.1730       | NRB                          |
| FCZ TP5-b   | -1.0500          | 0.0000        | 1.6200        | <b>3.3900</b> | 0.1350        | 0.0000   | -0.1730       | NRB                          |
| FLT         | 0.0007           | 0.0017        | 1.8500        | <b>3.2700</b> | 0.1390        | 0.0000   | -0.5570       | NRB                          |
| FLT TP3-a   | <b>0.8640</b>    | <b>0.9990</b> | 1.9100        | <b>3.5000</b> | <b>0.7540</b> | 0.0000   | <b>0.9350</b> | NRB                          |
| FLT TP3-b   | <b>0.8640</b>    | <b>0.9990</b> | 1.9100        | <b>3.5000</b> | <b>0.7540</b> | 0.0000   | <b>0.9350</b> | NRB                          |
| FLT TP6/7-a | -0.3270          | 0.0000        | 1.8300        | <b>3.0000</b> | 0.0583        | 0.0000   | 0.0334        | NRB                          |
| FLT TP6/7-b | -0.3270          | 0.0000        | 1.8300        | <b>3.0000</b> | 0.0583        | 0.0000   | 0.0334        | NRB                          |
| FLT TP6/7-c | -0.3270          | 0.0000        | 1.8300        | <b>3.0000</b> | 0.0583        | 0.0000   | 0.0334        | NRB                          |
| FLT TP8-a   | 0.4350           | 0.0710        | 2.1400        | <b>3.4600</b> | 0.4130        | 0.0000   | -0.2620       | NRB                          |
| FLT TP8-b   | 0.4350           | 0.0710        | 2.1400        | <b>3.4600</b> | 0.4130        | 0.0000   | -0.2620       | NRB                          |
| FLT TP8-c   | 0.4350           | 0.0710        | 2.1400        | <b>3.4600</b> | 0.4130        | 0.0000   | -0.2620       | NRB                          |
| FLT TP8-d   | 0.4350           | 0.0710        | 2.1400        | <b>3.4600</b> | 0.4130        | 0.0000   | -0.2620       | NRB                          |
| FLT TP9     | 0.1520           | 0.0040        | 1.9800        | <b>3.3800</b> | 0.2350        | 0.0000   | -0.3190       | NRB                          |
| FLT TP10-a  | -0.1130          | 0.0002        | 1.4800        | <b>3.0200</b> | -0.0301       | 0.0000   | -0.5490       | NRB                          |
| FLT TP10-b  | -0.1130          | 0.0002        | 1.4800        | <b>3.0200</b> | -0.0301       | 0.0000   | -0.5490       | NRB                          |
| FLT TP10-c  | -0.1130          | 0.0002        | 1.4800        | <b>3.0200</b> | -0.0301       | 0.0000   | -0.5490       | NRB                          |
| FLT TP11    | -0.1910          | 0.0002        | 1.6000        | <b>3.1000</b> | 0.0583        | 0.0000   | -0.7260       | NRB                          |
| FLT TP13-a  | 0.1090           | 0.0033        | 1.8700        | <b>3.2900</b> | 0.1510        | 0.0000   | -0.3810       | NRB                          |
| FLT TP13-b  | 0.1090           | 0.0033        | 1.8700        | <b>3.2900</b> | 0.1510        | 0.0000   | -0.3810       | NRB                          |
| FLT TP13-c  | 0.1090           | 0.0033        | 1.8700        | <b>3.2900</b> | 0.1510        | 0.0000   | -0.3810       | NRB                          |
| FRS         | 0.3510           | 0.0396        | 2.2100        | <b>3.1000</b> | 0.2390        | 0.0206   | -0.0629       | NRB                          |
| FRS TP3     | 0.3890           | 0.1140        | 2.3900        | <b>3.2200</b> | 0.3380        | 0.0729   | 0.2310        | NRB                          |

| Compound   | EPI Suite v 4.11 |          |          |          |          |          |          | VEGA HUB                     |
|------------|------------------|----------|----------|----------|----------|----------|----------|------------------------------|
|            | BIOWIN-1         | BIOWIN-2 | BIOWIN-3 | BIOWIN-4 | BIOWIN-5 | BIOWIN-6 | BIOWIN-7 | Ready Biodegradability Model |
| FRS TP12-a | 0.6580           | 0.5000   | 2.5200   | 3.3400   | 0.3460   | 0.0751   | 0.4200   | PRB                          |
| FRS TP12-b | 0.6580           | 0.5000   | 2.5200   | 3.3400   | 0.3460   | 0.0751   | 0.4200   | PRB                          |
| FRS TP12-c | 0.6580           | 0.5000   | 2.5200   | 3.3400   | 0.3460   | 0.0751   | 0.4200   | PRB                          |
| FRS TP14-a | 0.6960           | 0.7570   | 2.7000   | 3.4500   | 0.4440   | 0.2330   | 0.7140   | PRB                          |
| FRS TP14-b | 0.6960           | 0.7570   | 2.7000   | 3.4500   | 0.4440   | 0.2330   | 0.7140   | PRB                          |
| FRS TP14-c | 0.6960           | 0.7570   | 2.7000   | 3.4500   | 0.4440   | 0.2330   | 0.7140   | PRB                          |
| GFZ        | 0.7580           | 0.8550   | 2.5900   | 3.6600   | 0.6100   | 0.4860   | -0.2440  | NRB                          |
| GFZ TP8    | 0.7780           | 0.8590   | 2.6800   | 3.4700   | 0.3090   | 0.2720   | -0.1940  | PRB                          |
| IBP        | 0.8310           | 0.8670   | 2.9600   | 3.8000   | 0.4990   | 0.5340   | 0.0334   | NRB                          |
| IBP TP4-a  | 0.9400           | 0.9280   | 2.9800   | 3.8200   | 0.5120   | 0.5240   | 0.2100   | NRB                          |
| IBP TP4-b  | 0.9400           | 0.9280   | 2.9800   | 3.8200   | 0.5120   | 0.5240   | 0.2100   | NRB                          |
| IBP TP4-c  | 0.9400           | 0.9280   | 2.9800   | 3.8200   | 0.5120   | 0.5240   | 0.2100   | NRB                          |
| IBP TP4-d  | 0.9400           | 0.9280   | 2.9800   | 3.8200   | 0.5120   | 0.5240   | 0.2100   | NRB                          |
| IBP TP4-e  | 0.9280           | 0.8990   | 3.1600   | 3.9700   | 0.4540   | 0.5140   | 0.3210   | NRB                          |
| IBP TP4-f  | 0.6400           | 0.4820   | 2.7100   | 3.6200   | 0.4190   | 0.2240   | -0.1350  | NRB                          |
| IBP TP4-g  | 0.9830           | 0.9410   | 3.0800   | 3.9100   | 0.5950   | 0.6390   | 0.2720   | NRB                          |
| IBP TP4-h  | 0.9830           | 0.9410   | 3.0800   | 3.9100   | 0.5950   | 0.6390   | 0.2720   | NRB                          |
| IBP TP7-a  | 0.9310           | 0.9400   | 2.8200   | 3.5800   | 0.5050   | 0.4410   | 0.0445   | NRB                          |
| IBP TP7-b  | 0.8760           | 0.8980   | 2.8900   | 3.6500   | 0.3630   | 0.3200   | 0.0939   | NRB                          |
| IBP TP7-c  | 0.8880           | 0.9270   | 2.7100   | 3.4900   | 0.4210   | 0.3290   | -0.0176  | NRB                          |
| IBP TP7-d  | 0.8880           | 0.9270   | 2.7100   | 3.4900   | 0.4210   | 0.3290   | -0.0176  | NRB                          |
| IBP TP7-e  | 0.8880           | 0.9270   | 2.7100   | 3.4900   | 0.4210   | 0.3290   | -0.0176  | NRB                          |
| IBP TP7-f  | 0.8880           | 0.9270   | 2.7100   | 3.4900   | 0.4210   | 0.3290   | -0.0176  | NRB                          |
| IBP TP7-g  | 0.8760           | 0.8980   | 2.8900   | 3.6500   | 0.3630   | 0.3200   | 0.0939   | NRB                          |
| IBP TP7-h  | 0.5880           | 0.4770   | 2.4400   | 3.3000   | 0.3280   | 0.1140   | -0.3620  | NRB                          |
| IBP TP7-i  | 0.9310           | 0.9400   | 2.8200   | 3.5800   | 0.5050   | 0.4410   | 0.0445   | NRB                          |
| IBP TP7-j  | 0.9310           | 0.9400   | 2.8200   | 3.5800   | 0.5050   | 0.4410   | 0.0445   | NRB                          |
| IBP TP13   | 1.0400           | 1.0000   | 3.3000   | 4.2400   | 1.0000   | 0.9660   | 1.2500   | RB                           |
| IBP TP19-a | 0.9710           | 0.9990   | 2.8000   | 3.8800   | 0.6660   | 0.3590   | 0.1590   | NRB                          |
| IBP TP19-b | 0.9710           | 0.9990   | 2.8000   | 3.8800   | 0.6660   | 0.3590   | 0.1590   | NRB                          |
| IBP TP19-c | 0.9710           | 0.9990   | 2.8000   | 3.8800   | 0.6660   | 0.3590   | 0.1590   | NRB                          |
| IBP TP19-d | 0.9710           | 0.9990   | 2.8000   | 3.8800   | 0.6660   | 0.3590   | 0.1590   | NRB                          |
| IBP TP19-e | 1.0600           | 1.0000   | 2.8000   | 3.8800   | 0.7350   | 0.4210   | -0.0553  | NRB                          |
| IBP TP19-f | 0.9600           | 0.9990   | 2.9800   | 4.0400   | 0.6080   | 0.3490   | 0.2700   | NRB                          |
| IBP TP19-g | 0.6720           | 0.9880   | 2.5300   | 3.6900   | 0.5730   | 0.1280   | -0.1860  | NRB                          |
| IBP TP19-h | 1.0100           | 0.9990   | 2.9000   | 3.9700   | 0.7500   | 0.4740   | 0.2210   | NRB                          |
| LOS        | 0.6860           | 0.1860   | 2.4400   | 3.4000   | 0.1590   | 0.0079   | -0.6790  | PNRB                         |
| LOS TP1    | 0.7820           | 0.6340   | 2.6700   | 3.5300   | 0.1710   | 0.0515   | 0.2430   | -                            |
| LOS TP5-a  | 0.7940           | 0.3120   | 2.4600   | 3.4200   | 0.1710   | 0.0076   | -0.5030  | PNRB                         |
| LOS TP5-b  | 0.7940           | 0.3120   | 2.4600   | 3.4200   | 0.1710   | 0.0076   | -0.5030  | PNRB                         |
| LOS TP5-c  | 0.7940           | 0.3120   | 2.4600   | 3.4200   | 0.1710   | 0.0076   | -0.5030  | PNRB                         |



| Compound    | EPI Suite v 4.11 |               |               |               |          |          |          | VEGA HUB               |
|-------------|------------------|---------------|---------------|---------------|----------|----------|----------|------------------------|
|             | BIOWIN-1         | BIOWIN-2      | BIOWIN-3      | BIOWIN-4      | BIOWIN-5 | BIOWIN-6 | BIOWIN-7 | Ready Biodegradability |
|             |                  |               |               |               |          |          |          | Model                  |
| LOS TP5-d   | <b>0.7940</b>    | 0.3120        | 2.4600        | <b>3.4200</b> | 0.1710   | 0.0076   | -0.5030  | PNRB                   |
| LOS TP10    | <b>0.8130</b>    | <b>0.9900</b> | 2.3100        | <b>3.4700</b> | 0.2320   | 0.0104   | -0.6820  | PNRB                   |
| LOS TP11    | <b>0.7280</b>    | 0.0812        | 2.2700        | <b>3.2400</b> | 0.1790   | 0.0072   | -0.4200  | PNRB                   |
| LOS TP14    | <b>0.9520</b>    | <b>0.9310</b> | <b>2.9400</b> | <b>4.1400</b> | 0.4520   | 0.1680   | -0.6090  | NRB                    |
| LOS TP15-a  | <b>0.7940</b>    | 0.3120        | 2.4600        | <b>3.4200</b> | 0.1710   | 0.0076   | -0.5030  | PNRB                   |
| LOS TP15-b  | <b>0.7940</b>    | 0.3120        | 2.4600        | <b>3.4200</b> | 0.1710   | 0.0076   | -0.5030  | PNRB                   |
| LOS TP15-c  | <b>0.7940</b>    | 0.3120        | 2.4600        | <b>3.4200</b> | 0.1710   | 0.0076   | -0.5030  | PNRB                   |
| LOS TP15-d  | <b>0.7940</b>    | 0.3120        | 2.4600        | <b>3.4200</b> | 0.1710   | 0.0076   | -0.5030  | PNRB                   |
| NMS         | <b>0.5560</b>    | <b>0.5420</b> | 2.3100        | <b>3.3800</b> | 0.0021   | 0.0046   | 0.1750   | PNRB                   |
| NMS TP1 I   | <b>0.6640</b>    | <b>0.7010</b> | 2.3300        | <b>3.3900</b> | 0.0147   | 0.0044   | 0.3510   | PNRB                   |
| NMS TP1 II  | <b>0.6640</b>    | <b>0.7010</b> | 2.3300        | <b>3.3900</b> | 0.0147   | 0.0044   | 0.3510   | PNRB                   |
| NMS TP1 III | <b>0.5360</b>    | 0.2790        | 2.3100        | <b>3.3900</b> | 0.0147   | 0.0044   | 0.1330   | PNRB                   |
| PCT         | <b>1.0000</b>    | <b>0.9890</b> | <b>2.8700</b> | <b>3.8700</b> | 0.4260   | 0.4340   | -0.1120  | <b>PRB</b>             |
| PCT TP2     | <b>0.7220</b>    | <b>0.7600</b> | <b>2.9700</b> | <b>3.7100</b> | 0.4090   | 0.3310   | 0.4160   | -                      |
| PCT TP9-a   | <b>1.1100</b>    | <b>0.9940</b> | <b>2.8900</b> | <b>3.8900</b> | 0.4380   | 0.4240   | 0.0638   | <b>PRB</b>             |
| PCT TP9-b   | <b>1.1100</b>    | <b>0.9940</b> | <b>2.8900</b> | <b>3.8900</b> | 0.4380   | 0.4240   | 0.0638   | <b>PRB</b>             |
| PCT TP9-c   | <b>1.1100</b>    | <b>0.9940</b> | <b>2.8900</b> | <b>3.8900</b> | 0.4380   | 0.4240   | 0.0638   | <b>PRB</b>             |
| PCT TP9-d   | <b>1.1100</b>    | <b>0.9940</b> | <b>2.8900</b> | <b>3.8900</b> | 0.4380   | 0.4240   | 0.0638   | <b>PRB</b>             |

**Table S3.** *In silico*(Q)SAR prediction of PBT values by the Prometheus software for pharmaceuticals and TPs investigated in this study.

| Compound  | LogP  | LogP rel. | P    | P rel. | B    | B rel. | T     | T rel. | Score P | Score B | Score T | PBT   | PB    |
|-----------|-------|-----------|------|--------|------|--------|-------|--------|---------|---------|---------|-------|-------|
| CLO       | 1.14  | 1         | P/vP | 0.5    | 0.73 | 0.4    | 0.855 | 0.4    | 0.712   | 0.243   | 0.362   | 0.405 | 0.416 |
| CLO TP2   | 0.75  | 0.4       | P/vP | 0.5    | 1.01 | 0.4    | 0.634 | 0.4    | 0.712   | 0.26    | 0.38    | 0.42  | 0.43  |
| CLO TP3   | 0.71  | 0.4       | P/vP | 0.5    | 1.02 | 0.4    | 0.386 | 0.4    | 0.712   | 0.26    | 0.41    | 0.426 | 0.431 |
| CLO TP6   | 0.9   | 0.4       | P/vP | 0.5    | 0.48 | 0.8    | 1.79  | 0.4    | 0.712   | 0.108   | 0.324   | 0.286 | 0.277 |
| CLO TP16  | 0.81  | 0.4       | nP/P | 0.7    | 0.85 | 0.4    | 0.657 | 0.4    | 0.584   | 0.25    | 0.377   | 0.381 | 0.382 |
| CLO TP18  | 1.89  | 1         | nP   | 1      | 0.36 | 0.8    | 0.539 | 0.4    | 0.3     | 0.1     | 0.389   | 0.204 | 0.173 |
| FCZ       | 0.25  | 0.2       | vP   | 0.5    | 1.72 | 0.8    | -     | 0.5    | 0.854   | 0.24    | 0.5     | 0.462 | 0.453 |
| FCZ TP2-a | 1.08  | 0.2       | vP   | 0.5    | 1.7  | 0.8    | 0.255 | 0.4    | 0.854   | 0.237   | 0.437   | 0.447 | 0.45  |
| FCZ TP2-b | 1.08  | 0.2       | vP   | 0.5    | 1.65 | 0.8    | 0.233 | 0.3    | 0.854   | 0.229   | 0.45    | 0.444 | 0.443 |
| FCZ TP5-a | -0.88 | 0.2       | vP   | 0.5    | 1.73 | 0.8    | -     | 0.5    | 0.854   | 0.24    | 0.5     | 0.462 | 0.453 |
| FCZ TP5-b | -0.88 | 0.2       | vP   | 0.5    | 1.73 | 0.8    | -     | 0.5    | 0.854   | 0.24    | 0.5     | 0.462 | 0.453 |

| Compound   | LogP  | LogP rel. | P    | P rel. | B    | B rel. | T     | T rel. | Score P | Score B | Score T | PBT          | PB    |
|------------|-------|-----------|------|--------|------|--------|-------|--------|---------|---------|---------|--------------|-------|
| FLT        | 3.35  | 1         | P/vP | 0.5    | 1.88 | 0.8    | 0.185 | 0.4    | 0.712   | 0.265   | 0.458   | 0.439        | 0.435 |
| FLT TP3a   | -5    | 0.2       | nP   | 0.5    | 0.41 | 0.4    | -     | 0.5    | 0.359   | 0.228   | 0.5     | 0.32         | 0.286 |
| FLT TP3b   | -5    | 0.2       | nP   | 0.5    | 0.4  | 0.4    | -     | 0.5    | 0.359   | 0.227   | 0.5     | 0.319        | 0.286 |
| FLT TP6/7a | 3.12  | 0.4       | P/vP | 0.5    | 2.24 | 0.8    | 0.12  | 0.4    | 0.712   | 0.333   | 0.487   | 0.487        | 0.487 |
| FLT TP6/7b | 3.12  | 0.4       | P/vP | 0.5    | 3.01 | 0.8    | 0.121 | 0.4    | 0.712   | 0.506   | 0.487   | <b>0.576</b> | 0.6   |
| FLT TP6/7c | 3.12  | 0.4       | P/vP | 0.5    | 3.02 | 0.8    | 0.179 | 0.6    | 0.712   | 0.507   | 0.451   | <b>0.568</b> | 0.601 |
| FLT TP8-a  | 2.71  | 0.4       | P/vP | 0.5    | 1.4  | 0.4    | 0.828 | 0.6    | 0.712   | 0.29    | 0.334   | 0.427        | 0.454 |
| FLT TP8-b  | 2.52  | 0.8       | P/vP | 0.5    | 1.67 | 0.4    | 0.584 | 0.4    | 0.712   | 0.316   | 0.384   | 0.455        | 0.474 |
| FLT TP8-c  | 2.63  | 0.8       | P/vP | 0.5    | 1.31 | 0.8    | 0.514 | 0.4    | 0.712   | 0.183   | 0.392   | 0.367        | 0.361 |
| FLT TP8-d  | 2.63  | 0.8       | P/vP | 0.5    | 1.31 | 0.8    | 0.745 | 0.6    | 0.712   | 0.183   | 0.341   | 0.357        | 0.361 |
| FLT TP9    | 2.3   | 0.4       | P/vP | 0.5    | 1.43 | 0.4    | -     | 0.5    | 0.712   | 0.293   | 0.5     | 0.465        | 0.456 |
| FLT TP10-a | 2.19  | 0.4       | P/vP | 0.5    | 1.33 | 0.4    | 0.115 | 0.3    | 0.712   | 0.284   | 0.492   | 0.458        | 0.45  |
| FLT TP10-b | 2.19  | 0.4       | P/vP | 0.5    | 1.32 | 0.4    | 0.115 | 0.3    | 0.712   | 0.283   | 0.492   | 0.457        | 0.449 |
| FLT TP10-c | 2.19  | 0.4       | P/vP | 0.5    | 1.33 | 0.4    | 0.171 | 0.4    | 0.712   | 0.284   | 0.463   | 0.452        | 0.45  |
| FLT TP11   | 2.7   | 1         | P/vP | 0.5    | 1.72 | 0.4    | 0.245 | 0.3    | 0.712   | 0.322   | 0.447   | 0.472        | 0.479 |
| FLT TP13-a | 2.61  | 0.4       | P/vP | 0.5    | 2.27 | 0.8    | 0.117 | 0.4    | 0.712   | 0.339   | 0.489   | 0.491        | 0.491 |
| FLT TP13-b | 2.61  | 0.4       | P/vP | 0.5    | 1.73 | 0.4    | 0.167 | 0.4    | 0.712   | 0.323   | 0.465   | 0.476        | 0.479 |
| FLT TP13-c | 2.61  | 0.4       | P/vP | 0.5    | 1.74 | 0.4    | 0.174 | 0.6    | 0.712   | 0.323   | 0.454   | 0.474        | 0.48  |
| FRS        | 2.03  | 1         | nP   | 0.7    | 0.55 | 0.4    | 0.045 | 0.3    | 0.333   | 0.234   | 0.547   | 0.319        | 0.279 |
| FRS TP3    | 0.08  | 0.4       | nP/P | 0.5    | 0.2  | 0.8    | 0.101 | 0.4    | 0.571   | 0.092   | 0.5     | 0.268        | 0.229 |
| FRS TP12-a | 0.13  | 0.2       | vP   | 0.5    | 0.5  | 0.4    | 0.631 | 0.3    | 0.854   | 0.232   | 0.396   | 0.435        | 0.445 |
| FRS TP12-b | 0.48  | 0.2       | vP   | 0.5    | 0.57 | 0.4    | 0.066 | 0.3    | 0.854   | 0.235   | 0.525   | 0.462        | 0.448 |
| FRS TP12-c | 2.1   | 0.4       | vP   | 0.5    | 0.55 | 0.4    | 0.784 | 0.4    | 0.854   | 0.234   | 0.367   | 0.43         | 0.447 |
| FRS TP14-a | -0.75 | 0.4       | P/vP | 0.5    | 0.05 | 0.8    | 0.2   | 0.4    | 0.712   | 0.085   | 0.453   | 0.278        | 0.246 |
| FRS TP14-b | -0.14 | 0.4       | nP   | 0.7    | 0.05 | 0.8    | 0.511 | 0.3    | 0.333   | 0.085   | 0.407   | 0.2          | 0.168 |
| FRS TP14-c | -0.95 | 0.4       | vP   | 0.5    | 0.12 | 0.8    | 0.202 | 0.4    | 0.854   | 0.088   | 0.452   | 0.303        | 0.274 |
| GFZ        | 4.46  | 0.4       | nP   | 0.9    | 0.93 | 0.8    | 0.128 | 0.6    | 0.31    | 0.143   | 0.479   | 0.248        | 0.21  |
| GFZ TP8    | 2.33  | 0.4       | nP   | 0.7    | 0.66 | 0.4    | 2.2   | 0.4    | 0.333   | 0.239   | 0.315   | 0.288        | 0.282 |
| IBP        | 3.97  | 1         | nP   | 0.7    | 0.43 | 0.8    | 0.21  | 0.4    | 0.333   | 0.104   | 0.449   | 0.222        | 0.186 |

| Compound   | LogP  | LogP rel. | P    | P rel. | B    | B rel. | T       | T rel. | Score P | Score B | Score T | PBT   | PB    |
|------------|-------|-----------|------|--------|------|--------|---------|--------|---------|---------|---------|-------|-------|
| IBP TP4-a  | 3.1   | 0.8       | nP/P | 0.5    | 0.71 | 0.8    | 0.317   | 0.6    | 0.571   | 0.124   | 0.405   | 0.289 | 0.266 |
| IBP TP4-b  | 3.1   | 0.8       | nP/P | 0.5    | 0.5  | 0.8    | 0.309   | 0.6    | 0.571   | 0.109   | 0.407   | 0.275 | 0.249 |
| IBP TP4-c  | 3.1   | 0.8       | nP/P | 0.5    | 0.5  | 0.8    | 0.309   | 0.6    | 0.571   | 0.109   | 0.407   | 0.275 | 0.249 |
| IBP TP4-d  | 3.1   | 0.8       | nP/P | 0.5    | 0.71 | 0.8    | 0.317   | 0.6    | 0.571   | 0.124   | 0.405   | 0.289 | 0.266 |
| IBP TP4-e  | 2.4   | 0.8       | nP/P | 0.7    | 0.5  | 0.8    | 0.405   | 0.4    | 0.584   | 0.109   | 0.407   | 0.277 | 0.252 |
| IBP TP4-f  | 2.31  | 0.8       | nP/P | 0.7    | 0.7  | 0.8    | 0.411   | 0.4    | 0.584   | 0.123   | 0.406   | 0.291 | 0.268 |
| IBP TP4-g  | 2.38  | 0.8       | nP/P | 0.7    | 0.7  | 0.8    | 1.05    | 0.4    | 0.584   | 0.123   | 0.351   | 0.283 | 0.268 |
| IBP TP4-h  | 2.38  | 0.8       | nP/P | 0.7    | 0.7  | 0.8    | 1.05    | 0.4    | 0.584   | 0.123   | 0.351   | 0.283 | 0.268 |
| IBP TP7-a  | 3.16  | 0.4       | nP   | 0.5    | 1.51 | 0.8    | 0.488   | 0.4    | 0.359   | 0.209   | 0.395   | 0.294 | 0.273 |
| IBP TP7-b  | 3.27  | 0.8       | nP   | 0.5    | 1.69 | 0.8    | 0.653   | 0.4    | 0.359   | 0.235   | 0.378   | 0.306 | 0.29  |
| IBP TP7-c  | 3.77  | 0.4       | nP   | 0.5    | 1.75 | 0.8    | 0.214   | 0.6    | 0.359   | 0.244   | 0.437   | 0.32  | 0.296 |
| IBP TP7-d  | 3.77  | 0.4       | nP   | 0.5    | 2.05 | 0.8    | 0.22    | 0.6    | 0.359   | 0.296   | 0.434   | 0.345 | 0.326 |
| IBP TP7-e  | 3.77  | 0.4       | nP   | 0.5    | 2.05 | 0.8    | 0.22    | 0.6    | 0.359   | 0.296   | 0.434   | 0.345 | 0.326 |
| IBP TP7-f  | 3.77  | 0.4       | nP   | 0.5    | 1.75 | 0.8    | 0.214   | 0.6    | 0.359   | 0.244   | 0.437   | 0.32  | 0.296 |
| IBP TP7-g  | 3.32  | 0.8       | nP   | 0.5    | 1.69 | 0.8    | 0.373   | 0.4    | 0.359   | 0.235   | 0.412   | 0.311 | 0.29  |
| IBP TP7-h  | 3.22  | 0.8       | nP   | 0.5    | 1.66 | 0.8    | 0.495   | 0.4    | 0.359   | 0.231   | 0.394   | 0.306 | 0.288 |
| IBP TP7-i  | 3.3   | 0.8       | nP   | 0.5    | 1.66 | 0.8    | 0.513   | 0.4    | 0.359   | 0.231   | 0.392   | 0.306 | 0.288 |
| IBP TP7-j  | 3.3   | 0.8       | nP   | 0.5    | 1.66 | 0.8    | 0.513   | 0.4    | 0.359   | 0.231   | 0.392   | 0.306 | 0.288 |
| IBP TP13   | 0.51  | 0.8       | nP   | 0.9    | 0.17 | 0.4    | 0.837   | 0.4    | 0.31    | 0.219   | 0.364   | 0.279 | 0.261 |
| IBP TP19-a | 0.63  | 0.2       | nP/P | 0.7    | 0.38 | 0.4    | 0.157   | 0.4    | 0.584   | 0.227   | 0.469   | 0.383 | 0.364 |
| IBP TP19-b | 0.63  | 0.2       | nP/P | 0.7    | 0.38 | 0.4    | 0.157   | 0.4    | 0.584   | 0.227   | 0.469   | 0.383 | 0.364 |
| IBP TP19-c | 0.63  | 0.2       | nP/P | 0.7    | 0.42 | 0.4    | 0.158   | 0.4    | 0.584   | 0.228   | 0.469   | 0.384 | 0.365 |
| IBP TP19-d | 0.63  | 0.2       | nP/P | 0.7    | 0.42 | 0.4    | 0.158   | 0.4    | 0.584   | 0.228   | 0.469   | 0.384 | 0.365 |
| IBP TP19-e | 0.6   | 0.2       | nP/P | 0.7    | 0.48 | 0.4    | 0.169   | 0.3    | 0.584   | 0.231   | 0.469   | 0.386 | 0.367 |
| IBP TP19-f | -0.02 | 0.2       | nP/P | 0.7    | 0.31 | 0.4    | 0.27    | 0.3    | 0.584   | 0.224   | 0.442   | 0.376 | 0.361 |
| IBP TP19-g | 0.02  | 0.2       | nP/P | 0.7    | 0.3  | 0.4    | 0.27    | 0.3    | 0.584   | 0.224   | 0.442   | 0.376 | 0.361 |
| IBP TP19-h | 0.05  | 0.2       | nP/P | 0.7    | 0.3  | 0.4    | 0.27    | 0.3    | 0.584   | 0.224   | 0.442   | 0.376 | 0.361 |
| LOS        | 3.25  | 0.4       | nP   | 0.5    | 1.54 | 0.4    | 0.00007 | 0.3    | 0.359   | 0.303   | 0.752   | 0.389 | 0.33  |
| LOS TP1    | 2.37  | 0.4       | nP   | 0.5    | 1.13 | 0.4    | 0.354   | 0.3    | 0.359   | 0.268   | 0.427   | 0.331 | 0.31  |

| Compound    | LogP | LogP rel. | P    | P rel. | B    | B rel. | T       | T rel. | Score P | Score B | Score T | PBT   | PB    |
|-------------|------|-----------|------|--------|------|--------|---------|--------|---------|---------|---------|-------|-------|
| LOS TP5-a   | 2.77 | 0.4       | nP   | 0.5    | 1.37 | 0.4    | 0.00007 | 0.3    | 0.359   | 0.288   | 0.752   | 0.381 | 0.321 |
| LOS TP5-b   | 2.77 | 0.4       | nP   | 0.5    | 1.24 | 0.4    | 0.00007 | 0.3    | 0.359   | 0.276   | 0.752   | 0.375 | 0.315 |
| LOS TP5-c   | 2.77 | 0.4       | nP   | 0.5    | 1.38 | 0.4    | 0.00007 | 0.3    | 0.359   | 0.288   | 0.752   | 0.381 | 0.321 |
| LOS TP5-d   | 2.32 | 0.4       | P/vP | 0.5    | 1.05 | 0.4    | 0.00007 | 0.3    | 0.712   | 0.263   | 0.752   | 0.483 | 0.432 |
| LOS TP10    | 3.54 | 0.4       | P/vP | 0.5    | 1.74 | 0.4    | -       | 0.5    | 0.712   | 0.323   | 0.5     | 0.484 | 0.48  |
| LOS TP11    | 2.31 | 0.4       | P/vP | 0.5    | 1.23 | 0.4    | 0.00007 | 0.3    | 0.712   | 0.276   | 0.752   | 0.493 | 0.443 |
| LOS TP14    | 1.42 | 0.2       | P/vP | 0.5    | 0.7  | 0.4    | -       | 0.5    | 0.712   | 0.242   | 0.5     | 0.431 | 0.415 |
| LOS TP15-a  | 2.77 | 0.4       | nP   | 0.5    | 1.37 | 0.4    | 0.00007 | 0.3    | 0.359   | 0.288   | 0.752   | 0.381 | 0.321 |
| LOS TP15-b  | 2.77 | 0.4       | nP   | 0.5    | 1.24 | 0.4    | 0.00007 | 0.3    | 0.359   | 0.276   | 0.752   | 0.375 | 0.315 |
| LOS TP15-c  | 2.77 | 0.4       | nP   | 0.5    | 1.38 | 0.4    | 0.00007 | 0.3    | 0.359   | 0.288   | 0.752   | 0.381 | 0.321 |
| LOS TP15-d  | 2.32 | 0.4       | P/vP | 0.5    | 1.05 | 0.4    | 0.00007 | 0.3    | 0.712   | 0.263   | 0.752   | 0.483 | 0.432 |
| NMS         | 2.6  | 1         | P/vP | 0.5    | 1.79 | 0.4    | 0.064   | 0.3    | 0.712   | 0.329   | 0.527   | 0.492 | 0.484 |
| NMS TP1 I   | 2.24 | 0.8       | P/vP | 0.5    | 1.73 | 0.4    | 0.063   | 0.3    | 0.712   | 0.322   | 0.528   | 0.488 | 0.479 |
| NMS TP1 II  | 2.12 | 0.8       | P/vP | 0.5    | 1.62 | 0.4    | 0.068   | 0.3    | 0.712   | 0.311   | 0.523   | 0.48  | 0.47  |
| NMS TP1 III | 2.24 | 0.8       | P/vP | 0.5    | 1.72 | 0.4    | 0.063   | 0.3    | 0.712   | 0.321   | 0.528   | 0.488 | 0.478 |
| PCT         | 0.46 | 1         | nP/P | 0.5    | 0.39 | 0.8    | 54      | 0.7    | 0.571   | 0.102   | 0.133   | 0.214 | 0.242 |
| PCT TP2     | 1.04 | 0.4       | nP   | 0.5    | 0.53 | 0.8    | 3.43    | 0.4    | 0.359   | 0.111   | 0.296   | 0.216 | 0.199 |
| PCT TP9-a   | 0.24 | 0.8       | nP/P | 0.5    | 0.3  | 0.8    | 8.76    | 0.4    | 0.571   | 0.097   | 0.263   | 0.241 | 0.236 |
| PCT TP9-b   | 0.47 | 0.4       | nP/P | 0.5    | 0.09 | 0.8    | 8.53    | 0.4    | 0.571   | 0.087   | 0.264   | 0.23  | 0.222 |
| PCT TP9-c   | 0.47 | 0.4       | nP/P | 0.5    | 0.09 | 0.8    | 8.53    | 0.4    | 0.571   | 0.087   | 0.264   | 0.23  | 0.222 |
| PCT TP9-d   | 0.24 | 0.8       | nP/P | 0.5    | 0.3  | 0.8    | 8.76    | 0.4    | 0.571   | 0.097   | 0.263   | 0.241 | 0.236 |

**Table S4.** *In silico*(Q)SAR predictions for Mutagenicity and Carcinogenicity model for pharmaceuticals and TPs investigated in the present study.

| Comp.       | (Q)SAR Prediction |   |   |   |                    |                       |       |         |            |    |    |                 |   |   |   |              |
|-------------|-------------------|---|---|---|--------------------|-----------------------|-------|---------|------------|----|----|-----------------|---|---|---|--------------|
|             | VEGA HUB          |   |   |   | Mutagenicity       |                       |       |         | CASE ULTRA |    |    | Carcinogenicity |   |   |   |              |
|             | A                 | B | C | D | QSAR TOOLBOX       |                       |       |         | A          | B  | C  | VEGA HUB        |   |   |   | QSAR TOOLBOX |
|             |                   |   |   | A | B                  | C                     | D     |         |            |    | E  | F               | G | H | E |              |
| CLO         | +                 | + | - | + | AH/NiAr            | AH/ NiAr/H            | R/SN1 | -       | +          | +  | +  | -               | + | + | + | +            |
| CLO TP2     | +                 | + | - | + | NiAr               | NiAr/H                | R/SN1 | -       | +          | +  | +  | -               | + | + | + | +            |
| CLO TP3     | +                 | + | - | + | AH/NiAr            | AH/ NiAr/H            | -     | -       | +          | +  | +  | -               | + | + | + | +            |
| CLO TP6     | +                 | + | + | + | NiAr               | NiAr/H                | R/SN1 | -       | +          | +  | +  | -               | + | + | + | +            |
| CLO TP16    | +                 | + | - | + | AH/NiAr/AB         | AH/ NiAr/H            | R/SN1 | -       | +          | +  | +  | -               | + | + | + | +            |
| CLO TP18    | +                 | + | + | + | NiAr               | NiAr                  | R/SN1 | -       | +          | +  | +  | -               | + | + | + | +            |
| FCZ         | -                 | - | + | - | -                  | H                     | -     | -       | -          | -  | -  | +               | + | - | - | -            |
| FCZ TP2-a   | -                 | - | + | - | -                  | H                     | -     | -       | -          | -  | -  | +               | + | - | + | +            |
| FCZ TP2-b   | -                 | - | + | - | -                  | H                     | -     | -       | -          | -  | -  | +               | + | - | + | +            |
| FCZ TP5-a   | -                 | - | + | - | -                  | H                     | -     | -       | OD         | OD | OD | +               | + | + | - | -            |
| FCZ TP5-b   | -                 | - | + | - | -                  | H                     | -     | -       | OD         | OD | OD | +               | + | + | - | -            |
| FLT         | +                 | + | - | + | NiAr               | NiAr                  | R/SN1 | -       | -          | -  | -  | -               | + | + | + | +            |
| FLT TP3-a   | -                 | + | - | + | $\alpha$ - $\beta$ | $\alpha$ - $\beta$ /H | -     | -       | +          | +  | +  | -               | + | + | + | +            |
| FLT TP3-b   | -                 | + | + | + | $\alpha$ - $\beta$ | $\alpha$ - $\beta$ /H | -     | -       | +          | +  | +  | -               | + | + | + | +            |
| FLT TP6/7-a | +                 | + | - | + | -                  | H                     | -     | -       | +          | -  | +  | -               | + | + | + | -            |
| FLT TP6/7-b | +                 | + | + | + | NiAr               | NiAr/H                | R/SN1 | -       | +          | -  | +  | -               | + | + | + | +            |
| FLT TP6/7-c | +                 | + | + | + | NiAr               | NiAr/H                | R/SN1 | -       | +          | -  | +  | -               | + | + | + | +            |
| FLT TP8-a   | -                 | - | - | - | -                  | -                     | -     | AN2/Acy | -          | -  | -  | -               | + | + | - | -            |
| FLT TP8-b   | -                 | - | - | - | -                  | -                     | -     | -       | -          | -  | -  | -               | + | + | - | -            |
| FLT TP8-c   | -                 | - | - | - | -                  | H                     | -     | AN2/Acy | -          | -  | -  | -               | + | + | - | -            |
| FLT TP8-d   | -                 | - | - | - | -                  | H                     | -     | AN2/Acy | -          | -  | -  | -               | + | + | - | -            |
| FLT TP9     | +                 | + | - | + | NiAr               | NiAr/H                | R/SN1 | -       | Inc.       | -  | -  | +               | + | + | + | +            |
| FLT TP10-a  | +                 | + | + | + | -                  | H                     | -     | -       | OD         | OD | -  | +               | + | + | + | -            |
| FLT TP10-b  | +                 | + | + | + | NiAr               | NiAr/H                | R/SN1 | AN2/Acy | -          | OD | +  | +               | + | + | + | +            |
| FLT TP10-c  | +                 | + | + | + | NiAr               | NiAr/H                | R/SN1 | AN2/Acy | +          | OD | +  | +               | + | + | + | +            |

| Comp.      | (Q)SAR Prediction |   |   |   |                              |        |       |         |            |   |   |                             |   |   |   |              |
|------------|-------------------|---|---|---|------------------------------|--------|-------|---------|------------|---|---|-----------------------------|---|---|---|--------------|
|            | VEGA HUB          |   |   |   | Mutagenicity<br>QSAR TOOLBOX |        |       |         | CASE ULTRA |   |   | Carcinogenicity<br>VEGA HUB |   |   |   | QSAR TOOLBOX |
|            | A                 | B | C | D | A                            | B      | C     | D       | A          | B | C | E                           | F | G | H | E            |
| FLT TP11   | +                 | + | - | + | NiAr                         | NiAr/H | R/SN1 | -       | +          | - | - | +                           | + | + | + | +            |
| FLT TP13-a | +                 | + | + | + | -                            | H      | -     | -       | -          | - | - | +                           | + | + | + | -            |
| FLT TP13-b | +                 | + | + | + | NiAr                         | NiAr/H | R/SN1 | AN2/Acy | -          | - | - | +                           | + | + | + | +            |
| FLT TP13-c | +                 | + | + | + | NiAr                         | NiAr/H | -     | AN2/Acy | -          | - | - | +                           | + | + | + | +            |
| FRS        | -                 | - | - | - | -                            | H      | -     | -       | -          | - | - | -                           | + | + | + | +            |
| FRS TP3    | -                 | - | - | - | -                            | H      | -     | -       | -          | - | - | -                           | + | + | + | +            |
| FRS TP12-a | -                 | - | - | - | -                            | H      | -     | -       | -          | - | - | -                           | + | + | + | +            |
| FRS TP12-b | -                 | - | - | - | -                            | H      | -     | -       | -          | - | - | -                           | + | + | + | +            |
| FRS TP12-c | -                 | - | - | - | -                            | H      | -     | AN2     | -          | - | - | -                           | + | + | + | +            |
| FRS TP14-a | -                 | - | - | - | -                            | H      | -     | -       | -          | - | - | -                           | + | + | + | +            |
| FRS TP14-b | -                 | - | - | - | -                            | H      | -     | -       | -          | - | - | -                           | + | + | + | +            |
| FRS TP14-c | -                 | - | - | - | -                            | H      | -     | -       | -          | - | - | -                           | + | + | + | +            |
| GFZ        | -                 | - | - | - | -                            | -      | -     | -       | -          | - | - | -                           | - | - | + | +            |
| GFZ TP8    | -                 | - | - | - | -                            | -      | -     | -       | -          | - | - | -                           | - | - | - | -            |
| IBP        | -                 | - | - | - | -                            | -      | -     | -       | -          | - | - | -                           | - | + | - | -            |
| IBP TP4-a  | -                 | - | - | - | -                            | -      | -     | AN2     | -          | - | - | -                           | - | + | - | -            |
| IBP TP4-b  | -                 | - | - | - | -                            | -      | -     | AN2     | -          | - | - | -                           | - | + | - | -            |
| IBP TP4-c  | -                 | - | - | - | -                            | -      | -     | AN2     | -          | - | - | -                           | - | + | - | -            |
| IBP TP4-d  | -                 | - | - | - | -                            | -      | -     | AN2     | -          | - | - | -                           | - | + | - | -            |
| IBP TP4-e  | -                 | - | - | - | -                            | -      | -     | -       | -          | - | - | -                           | - | + | - | -            |
| IBP TP4-f  | -                 | - | - | - | -                            | -      | -     | -       | -          | - | - | -                           | - | + | - | -            |
| IBP TP4-g  | -                 | - | - | - | -                            | -      | -     | -       | -          | - | - | -                           | - | + | - | -            |
| IBP TP4-h  | -                 | - | - | - | -                            | -      | -     | -       | -          | - | - | -                           | - | + | - | -            |
| IBP TP7-a  | -                 | - | - | - | -                            | -      | -     | -       | -          | - | - | -                           | - | + | - | -            |
| IBP TP7-b  | -                 | - | - | - | -                            | -      | -     | -       | -          | - | - | -                           | - | - | - | -            |
| IBP TP7-c  | -                 | - | - | - | -                            | -      | -     | AN2     | -          | - | - | -                           | - | - | - | -            |
| IBP TP7-d  | -                 | - | - | - | -                            | -      | -     | AN2     | -          | - | - | +                           | - | - | - | -            |

| Comp.      | (Q)SAR Prediction |   |   |   |                              |        |   |     |            |      |      |                 |   |   |   |              |
|------------|-------------------|---|---|---|------------------------------|--------|---|-----|------------|------|------|-----------------|---|---|---|--------------|
|            | VEGA HUB          |   |   |   | Mutagenicity<br>QSAR TOOLBOX |        |   |     | CASE ULTRA |      |      | Carcinogenicity |   |   |   | QSAR TOOLBOX |
|            | A                 | B | C | D | A                            | B      | C | D   | A          | B    | C    | E               | F | G | H | E            |
| IBP TP7-e  | -                 | - | - | - | -                            | -      | - | AN2 | -          | -    | -    | +               | - | - | - | -            |
| IBP TP7-f  | -                 | - | - | - | -                            | -      | - | AN2 | -          | -    | -    | -               | - | - | - | -            |
| IBP TP7-g  | -                 | - | - | - | -                            | -      | - | -   | -          | -    | -    | -               | - | - | - | -            |
| IBP TP7-h  | -                 | - | - | - | -                            | -      | - | -   | -          | -    | -    | +               | - | - | - | -            |
| IBP TP7-i  | -                 | - | - | - | -                            | -      | - | -   | -          | -    | -    | -               | - | - | - | -            |
| IBP TP7-j  | -                 | - | - | - | -                            | -      | - | -   | -          | -    | -    | -               | - | + | - | -            |
| IBP TP13   | -                 | + | - | - | SiAi                         | SiAi   | - | -   | -          | -    | -    | -               | - | - | + | +            |
| IBP TP19-a | -                 | + | - | - | SiAi                         | SiAi/H | - | AN2 | Inc.       | Inc. | Inc. | +               | - | + | + | +            |
| IBP TP19-b | -                 | + | - | - | -                            | -      | - | AN2 | Inc.       | Inc. | Inc. | +               | - | + | + | +            |
| IBP TP19-c | -                 | + | - | - | SiAi                         | SiAi/H | - | AN2 | -          | Inc. | Inc. | +               | - | + | + | +            |
| IBP TP19-d | -                 | + | - | - | -                            | -      | - | AN2 | -          | Inc. | Inc. | +               | - | + | + | +            |
| IBP TP19-e | -                 | + | - | - | SiAi                         | SiAi/H | - | -   | Inc.       | Inc. | -    | +               | - | + | + | +            |
| IBP TP19-f | -                 | + | - | - | SiAi                         | SiAi/H | - | -   | Inc.       | Inc. | -    | +               | - | + | + | +            |
| IBP TP19-g | -                 | + | - | - | SiAi                         | SiAi/H | - | -   | -          | Inc. | -    | +               | - | + | + | +            |
| IBP TP19-h | -                 | + | - | - | SiAi                         | SiAi/H | - | -   | -          | Inc. | -    | +               | - | + | + | +            |
| LOS        | -                 | - | + | - | -                            | H      | - | -   | -          | -    | -    | -               | - | + | - | -            |
| LOS TP1    | -                 | - | - | - | -                            | H      | - | -   | -          | -    | -    | -               | - | - | - | -            |
| LOS TP5-a  | -                 | - | - | - | -                            | H      | - | AN2 | -          | -    | -    | +               | - | + | + | +            |
| LOS TP5-b  | -                 | - | - | - | -                            | H      | - | AN2 | -          | -    | -    | +               | - | + | - | -            |
| LOS TP5-c  | -                 | - | - | - | -                            | H      | - | AN2 | -          | -    | -    | +               | - | + | - | -            |
| LOS TP5-d  | -                 | - | - | - | -                            | H      | - | AN2 | -          | -    | -    | +               | - | + | - | -            |
| LOS TP10   | -                 | + | + | - | SiAi                         | SiAi/  | - | -   | -          | -    | -    | -               | - |   | + | +            |
| LOS TP11   | -                 | - | - | - | -                            | H      | - | -   | -          | -    | -    | +               | - | + | - | -            |
| LOS TP14   | -                 | - | + | + | -                            | H      | - | -   | -          | -    | -    | -               | - | + | - | -            |
| LOS TP15-a | -                 | - | - | - | -                            | H      | - | AN2 | -          | -    | -    | +               | - | + | + | -            |
| LOS TP15-b | -                 | - | - | - | -                            | H      | - | AN2 | -          | -    | -    | +               | - | + | - | -            |
| LOS TP15-c | -                 | - | - | - | -                            | H      | - | AN2 | -          | -    | -    | +               | - | + | - | -            |

| Comp.        | (Q)SAR Prediction |   |   |   |              |             |     |         |            |   |      |                 |   |   |   |              |
|--------------|-------------------|---|---|---|--------------|-------------|-----|---------|------------|---|------|-----------------|---|---|---|--------------|
|              | VEGA HUB          |   |   |   | Mutagenicity |             |     |         | CASE ULTRA |   |      | Carcinogenicity |   |   |   |              |
|              | A                 | B | C | D | QSAR TOOLBOX |             |     |         | A          | B | C    | VEGA HUB        |   |   |   | QSAR TOOLBOX |
|              |                   |   |   |   | A            | B           | C   | D       |            |   |      | E               | F | G | H | E            |
| LOS TP15-d   | -                 | - | - | - | -            | H           | -   | AN2     | -          | - | -    | +               | - | + | - | -            |
| NMS          | +                 | + | + | + | NiAr         | NiAr/H/1-PB | -   | -       | +          | + | +    | +               | + | + | + | +            |
| NMS TP 1 I   | +                 | + | + | + | NiAr         | NiAr/H/1-PB | -   | -       | +          | + | +    | -               | + | + | + | +            |
| NMS TP 1 II  | +                 | + | + | + | NiAr         | NiAr/H/1-PB | -   | -       | -          | - | +    | +               | + | + | + | +            |
| NMS TP 1 III | +                 | + | + | + | NiAr         | NiAr/H/1-PB | -   | -       | -          | + | +    | +               | + | + | + | +            |
| PCT          | -                 | + | - | - | ArNacyl      | ArNacyl     | -   | AN2/Acy | -          | - | -    | -               | - | + | + | +            |
| PCT TP2      | -                 | + | + | + | ArNacyl      | N-Me        | AN2 | -       | Inc.       | + | Inc. | -               | - | + | + | +            |
| PCT TP 9-a   | -                 | + | - | - | ArNacyl      | ArNacyl/H   | -   | AN2/Acy | +          | + | Inc. | -               | + | + | + | +            |
| PCT TP 9-b   | +                 | + | - | - | ArNacyl      | ArNacyl/H   | -   | AN2/Acy | +          | + | +    | -               | - | + | + | +            |
| PCT TP 9-c   | +                 | + | - | - | ArNacyl      | ArNacyl/H   | -   | AN2/Acy | +          | + | +    | -               | - | + | + | +            |
| PCT TP 9-d   | +                 | + | - | - | ArNacyl      | ArNacyl/H   | -   | AN2/Acy | +          | + | Inc. | -               | + | + | + | +            |

Legends: **VEGA HUB A**: Mutagenicity (Ames test) model (CAESAR); **VEGA HUB B**: Mutagenicity (Ames test) model (ISS); **VEGA HUB C**: Mutagenicity (Ames test) model (KNN/Read-Across); **VEGA HUB D**: Mutagenicity (Ames test) model (SarPy/IRFMN) (version 1.0.7); **VEGA HUB E**: Carcinogenicity model (CAESAR); **VEGA HUB F**: IRFMN\_Antares; **VEGA HUB G**: Carcinogenicity model (IRFMN\_ISSCAN-CGX); **VEGA HUB H**: Carcinogenicity model (ISS); **QSAR TOOLBOX A**: in vivo mutagenicity (Ames Test) alerts by ISS; **QSAR TOOLBOX B**: in vivo mutagenicity (Micronucleus) alerts by ISS; **QSAR TOOLBOX C**: DNA alerts for AMES, CA and MNT by OASIS; **QSAR TOOLBOX D**: Protein binding alerts for Chromosomal aberration by OASIS; **QSAR TOOLBOX E**: Carcinogenicity (genotox and nongenotox) alerts by ISS; **CASEULTRA A**: GT1\_BMUT; **CASEULTRA B**: GT\_EXPERT; **CASEULTRA C**: PHARM\_BMUT.

**Alerts:** (+) Positive alerts; (-) negative Alerts; ( $\alpha$ - $\beta$ )  $\alpha$ - $\beta$ -unsaturated carbonyls; (1-PB) 1-phenoxy-benzene; (AB) Alkenyl benzenes; (Acy) Acylation; (AH) Aliphatic halogens; (AN2) Addition Nucleophile 2 - Michael-type addition to quinoid structures; (ArNacyl) Aromatic N-acyl amine; (H) Hacceptor-path3-Hacceptor; (N-Me) N-methylol derivatives; (NiAr) Nitro aromatic; (R) Radical mechanism via ROS formation (indirect); (SiAi): Simple aldehyde; (SN1): Substitution Nucleophile 1- Nucleophilic attack after reduction and nitrenium ion.



**Text S5.** Structure alerts for biodegradability or non-biodegradability TPs.

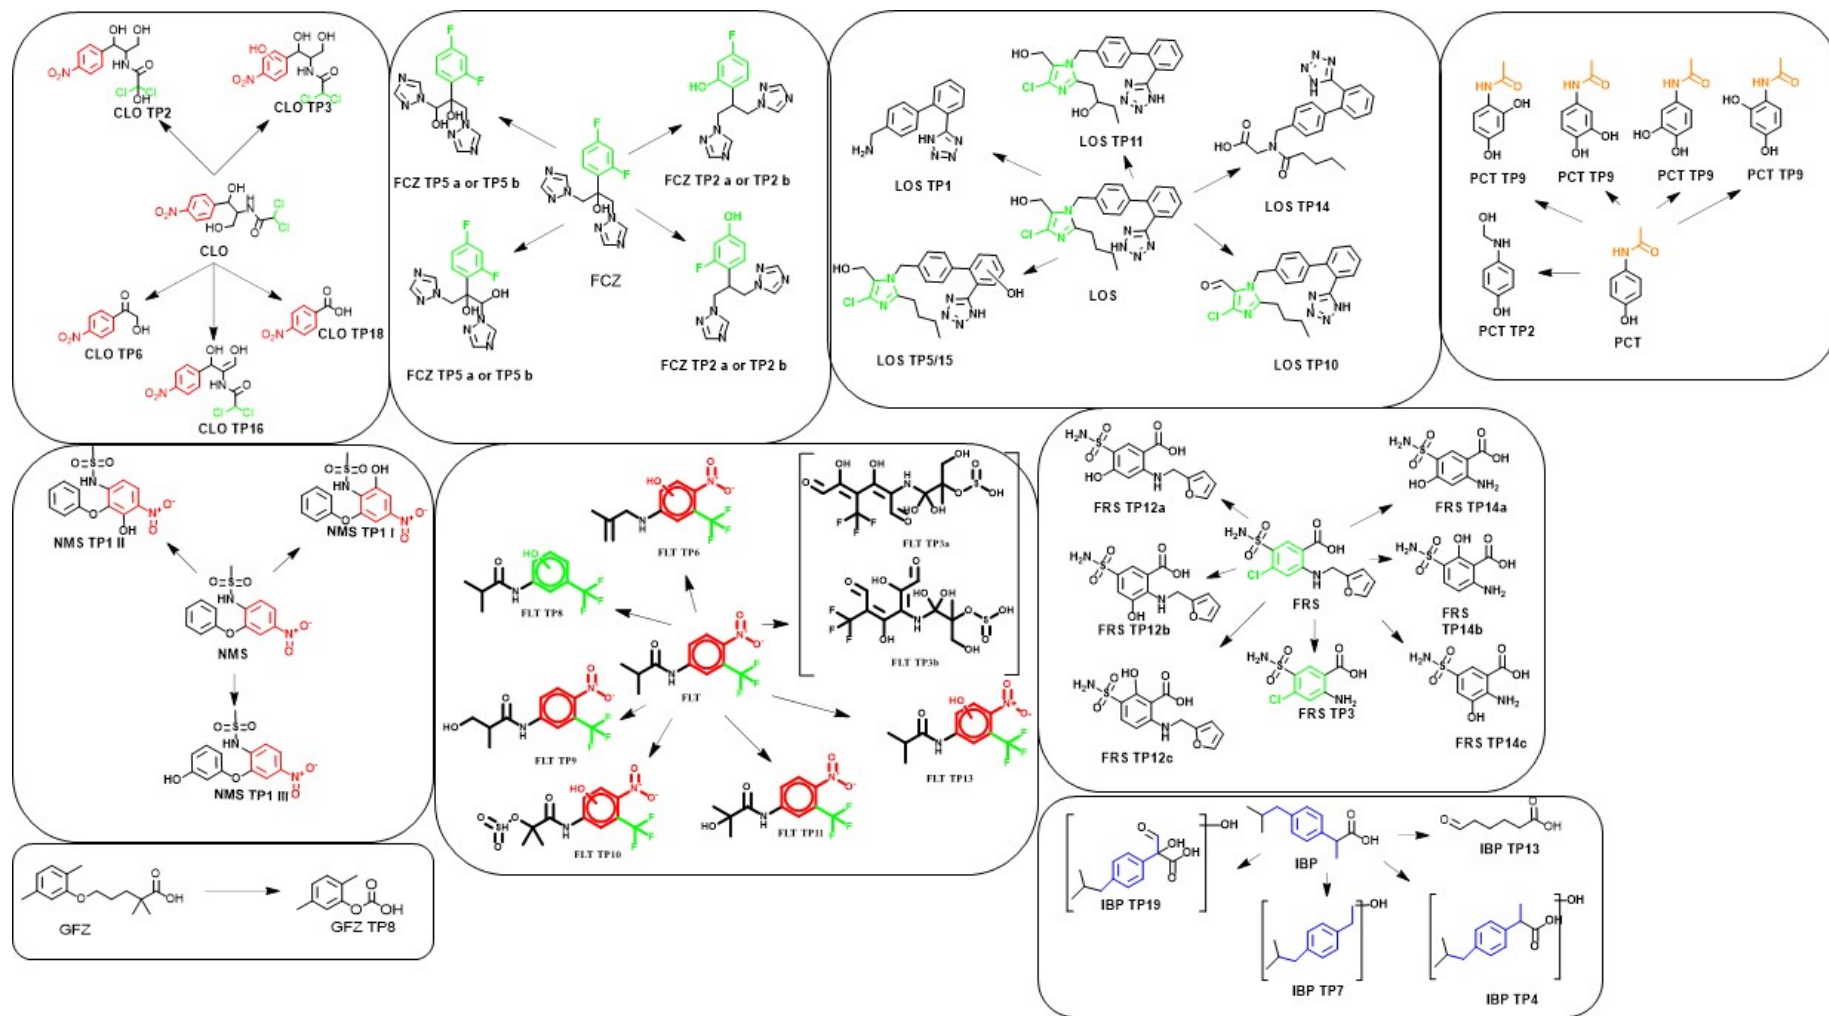

**Figure S8.** Structure alerts for non-biodegradable compounds: in red (nitroaromatic); in green (halogens); in blue (1,4-diethylbenzene moiety). Structure alerts for biodegradable compounds: in Orange (1,4-diethylbenzene moiety).
